# Supplementary material
Source: PubMed Central journal article supplement (PMC4641440)
Supplement: NIHMS732399-supplement-Supplementary_Figure_1.pdf [file NIHMS732399-supplement-Supplementary_Figure_1.pdf]

# Supplemental Figure 1

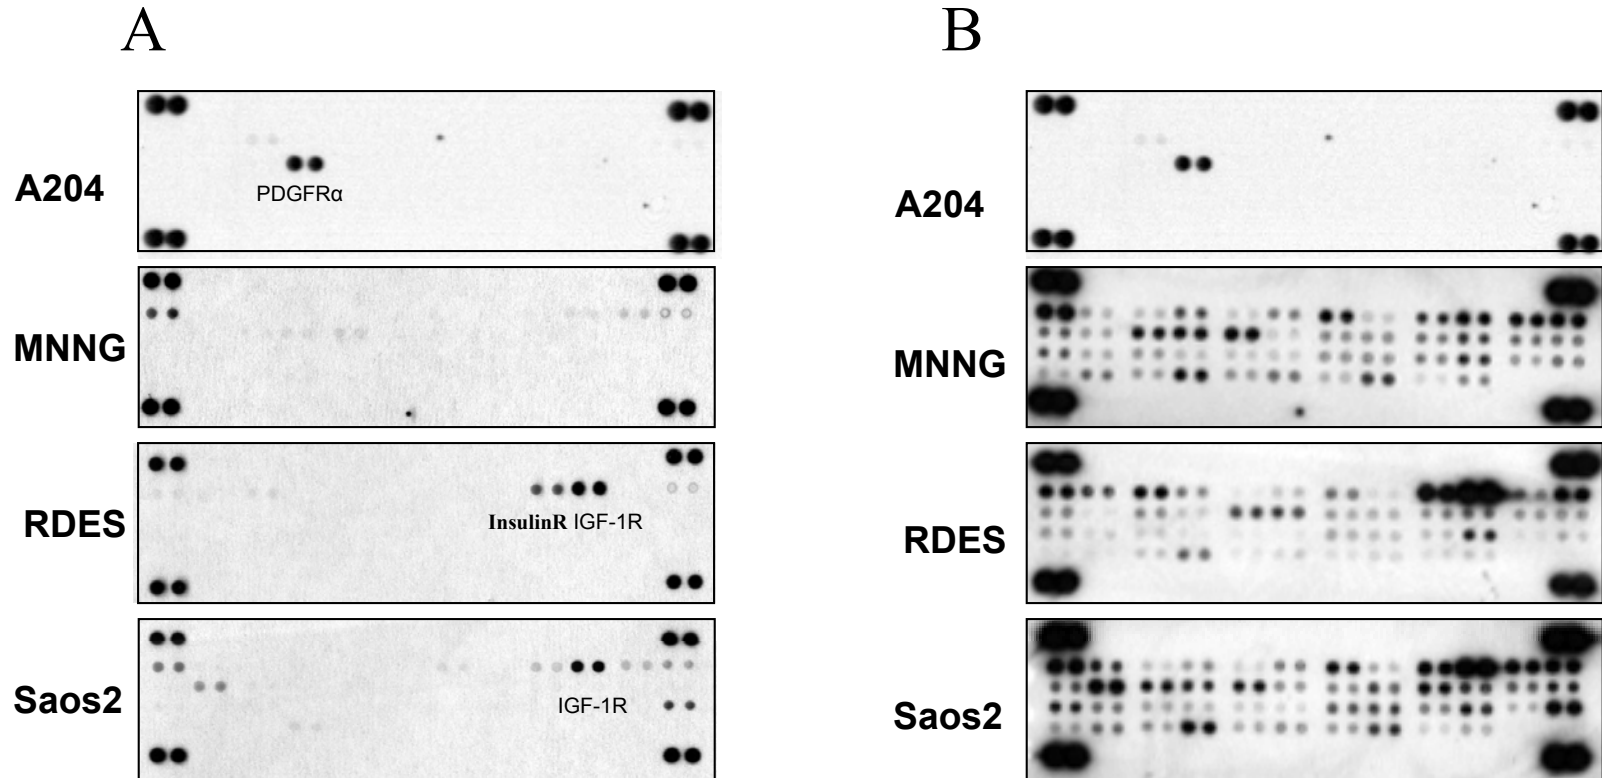

**C**

|                 |                     |                    |                 |                   |                 |  |  |  |                 |
|-----------------|---------------------|--------------------|-----------------|-------------------|-----------------|--|--|--|-----------------|
| <b>Posi Ctr</b> |                     |                    |                 |                   |                 |  |  |  | <b>posi ctr</b> |
| EGFR ErbB2      | ErbB3 ErbB4         | FGFR1 FGFR2a       | FGFR3 FGFR4     | InsulinR IGF-1 R  | Ax1 Dtk         |  |  |  |                 |
| Mer HGFR        | MSPR PDGFR $\alpha$ | PDGFR $\beta$ SCFR | Flt-3 M-CSFR    | C-Ret ROR1        | ROR2 Tie-1      |  |  |  |                 |
| Tie-2 TrkA      | TrkB TrkC           | VEGFR1 VEGFR2      | VEGFR3 MuSK     | EphA1 EphA2       | EphA3 EphA4     |  |  |  |                 |
| EphA6 EphA7     | EphB1 EphB2         | EphB4 EphB6        | Mouse IgG1 IG2A | MouseIgG Goat IgG | PBS             |  |  |  |                 |
| <b>Posi ctr</b> |                     |                    |                 |                   | <b>Posi ctr</b> |  |  |  |                 |
