# Supplementary material
Source: PubMed Central journal article supplement (PMC4641440)
Supplement: NIHMS732399-supplement-Supplementary_Table_1.pdf [file NIHMS732399-supplement-Supplementary_Table_1.pdf]

**Supplemental Table 1 Phosphotyrosine peptides spectral counts/protein in 10 sarcoma cell lines**

| Protein      | Description                                                                | A204 | RD18 | MNNG | U2OS | Saos2 | MG63 | A673 |
|--------------|----------------------------------------------------------------------------|------|------|------|------|-------|------|------|
| <b>A26CA</b> | ANKRD26-like family C member 1A - Homo sapiens (Human)                     | 1    | 4    | 7    | 4    | 2     | 3    | 4    |
| <b>A4</b>    | Amyloid beta A4 protein precursor - Homo sapiens (Human)                   | 7    | 9    | 7    |      | 7     | 10   | 4    |
| <b>AAAT</b>  | Neutral amino acid transporter B(0) - Homo sapiens (Human)                 |      |      |      |      |       | 2    | 2    |
| <b>ABCA1</b> | ATP-binding cassette sub-family A member 1 - Homo sapiens (Human)          |      |      |      |      |       |      |      |
| <b>ABCA4</b> | Retinal-specific ATP-binding cassette transporter - Homo sapiens (Human)   |      |      |      |      | 1     |      |      |
| <b>ABI1</b>  | Abl interactor 1 - Homo sapiens (Human)                                    | 4    | 6    | 8    | 10   | 6     | 5    | 13   |
| <b>ABI2</b>  | Abl interactor 2 - Homo sapiens (Human)                                    |      |      | 1    | 1    | 1     |      | 4    |
| <b>ABL1</b>  | Proto-oncogene tyrosine-protein kinase ABL1 - Homo sapiens (Human)         | 6    | 8    | 4    | 4    | 2     |      | 3    |
| <b>ABL2</b>  | Tyrosine-protein kinase ABL2 - Homo sapiens (Human)                        |      |      |      | 6    | 2     | 2    | 1    |
| <b>ABLM1</b> | Actin-binding LIM protein 1 - Homo sapiens (Human)                         |      |      |      | 5    | 8     | 3    |      |
| <b>ACD11</b> | Acyl-CoA dehydrogenase family member 11 - Homo sapiens (Human)             |      | 3    |      |      |       | 2    |      |
| <b>ACK</b>   | Activated CDC42 kinase 1 - Homo sapiens (Human)                            | 13   | 12   | 4    | 5    | 22    | 12   | 3    |
| <b>ACLY</b>  | ATP-citrate synthase - Homo sapiens (Human)                                |      |      |      |      |       |      |      |
| <b>ACM3</b>  | Muscarinic acetylcholine receptor M3 - Homo sapiens (Human)                |      | 2    |      |      |       |      |      |
| <b>ACTA</b>  | Actin, aortic smooth muscle - Homo sapiens (Human)                         |      |      |      |      | 1     |      |      |
| <b>ACTB</b>  | Actin, cytoplasmic 1 - Homo sapiens (Human)                                | 1    | 1    | 3    |      |       | 1    | 1    |
| <b>ACTN1</b> | Alpha-actinin-1 - Homo sapiens (Human)                                     | 4    | 4    | 4    | 6    | 6     | 6    | 4    |
| <b>ACTN4</b> | Alpha-actinin-4 - Homo sapiens (Human)                                     | 2    | 2    | 2    | 2    | 9     | 7    |      |
| <b>ACTS</b>  | Actin, alpha skeletal muscle - Homo sapiens (Human)                        |      |      | 2    |      |       |      |      |
| <b>ADA20</b> | ADAM 20 precursor - Homo sapiens (Human)                                   |      |      |      |      |       |      | 1    |
| <b>ADA22</b> | ADAM 22 precursor - Homo sapiens (Human)                                   |      |      |      |      |       |      | 1    |
| <b>ADAM9</b> | ADAM 9 precursor - Homo sapiens (Human)                                    | 6    | 2    | 7    | 5    | 4     | 5    | 3    |
| <b>ADDG</b>  | Gamma-adducin - Homo sapiens (Human)                                       | 1    |      |      |      |       |      | 1    |
| <b>ADT1</b>  | ADP/ATP translocase 1 - Homo sapiens (Human)                               |      | 2    |      |      |       |      |      |
| <b>ADT2</b>  | ADP/ATP translocase 2 - Homo sapiens (Human)                               |      | 1    |      |      |       |      |      |
| <b>AF1L2</b> | Actin filament-associated protein 1-like 2 - Homo sapiens (Human)          |      |      | 4    |      | 4     | 1    |      |
| <b>AFAD</b>  | Afadin - Homo sapiens (Human)                                              |      |      |      |      | 6     |      |      |
| <b>AFF4</b>  | AF4/FMR2 family member 4 - Homo sapiens (Human)                            |      |      |      |      |       |      |      |
| <b>AHNK</b>  | Neuroblast differentiation-associated protein AHNAK - Homo sapiens (Human) | 29   |      | 9    | 11   | 13    | 11   | 1    |
| <b>AHTF1</b> | AT-hook-containing transcription factor 1 - Homo sapiens (Human)           |      |      |      |      |       |      |      |
| <b>ALK</b>   | ALK tyrosine kinase receptor precursor - Homo sapiens (Human)              |      | 1    |      |      |       |      | 1    |
| <b>AMY1</b>  | Alpha-amylase 1 precursor - Homo sapiens (Human)                           |      |      |      | 2    |       |      |      |

|              |                                                                                 |    |    |    |    |    |    |    |
|--------------|---------------------------------------------------------------------------------|----|----|----|----|----|----|----|
| <b>ANK2</b>  | Ankyrin-2 - Homo sapiens (Human)                                                | 3  | 3  |    |    |    |    |    |
| <b>ANKS1</b> | Ankyrin repeat and SAM domain-containing protein 1A - Homo sapiens (Human)      |    | 3  |    | 2  |    | 4  | 1  |
| <b>ANM1</b>  | Protein arginine N-methyltransferase 1 - Homo sapiens (Human)                   |    |    | 1  |    |    |    |    |
| <b>ANR26</b> | Ankyrin repeat domain-containing protein 26 - Homo sapiens (Human)              |    |    |    |    |    |    | 2  |
| <b>ANTR1</b> | Anthrax toxin receptor 1 precursor - Homo sapiens (Human)                       | 4  | 13 |    |    | 5  | 4  | 6  |
| <b>ANTR2</b> | Anthrax toxin receptor 2 precursor - Homo sapiens (Human)                       |    | 4  |    |    |    |    |    |
| <b>ANXA1</b> | Annexin A1 - Homo sapiens (Human)                                               |    |    |    |    |    | 1  |    |
| <b>ANXA2</b> | Annexin A2 - Homo sapiens (Human)                                               | 27 |    | 11 | 15 | 6  | 14 | 8  |
| <b>ANXA5</b> | Annexin A5 - Homo sapiens (Human)                                               |    |    |    |    | 1  | 3  |    |
| <b>APC</b>   | Adenomatous polyposis coli protein - Homo sapiens (Human)                       |    | 1  |    |    |    |    |    |
| <b>APH1A</b> | Gamma-secretase subunit APH-1A - Homo sapiens (Human)                           |    |    |    |    |    |    |    |
| <b>APLP1</b> | Amyloid-like protein 1 precursor - Homo sapiens (Human)                         | 5  |    |    |    |    |    |    |
| <b>APLP2</b> | Amyloid-like protein 2 precursor - Homo sapiens (Human)                         | 16 | 4  | 3  | 4  | 4  | 18 | 5  |
| <b>APMAP</b> | Adipocyte plasma membrane-associated protein - Homo sapiens (Human)             |    |    |    |    | 1  |    |    |
| <b>APOC2</b> | Apolipoprotein C-II precursor - Homo sapiens (Human)                            |    |    |    |    | 1  |    |    |
| <b>ARFG3</b> | ADP-ribosylation factor GTPase-activating protein 3 - Homo sapiens (Human)      |    | 1  |    |    |    | 2  |    |
| <b>ARI1A</b> | AT-rich interactive domain-containing protein 1A - Homo sapiens (Human)         |    |    | 7  |    |    |    |    |
| <b>ARI1B</b> | AT-rich interactive domain-containing protein 1B - Homo sapiens (Human)         |    |    | 2  |    |    |    |    |
| <b>ARNT</b>  | Aryl hydrocarbon receptor nuclear translocator - Homo sapiens (Human)           |    |    | 3  |    |    |    |    |
| <b>ARP10</b> | Actin-related protein 10 - Homo sapiens (Human)                                 |    |    |    |    |    |    |    |
| <b>ARP19</b> | cAMP-regulated phosphoprotein 19 - Homo sapiens (Human)                         |    |    | 3  |    | 4  |    |    |
| <b>ARRD3</b> | Arrestin domain-containing protein 3 - Homo sapiens (Human)                     |    |    |    |    |    | 3  |    |
| <b>ASH2L</b> | Set1/Ash2 histone methyltransferase complex subunit ASH2 - Homo sapiens (Human) |    |    | 1  |    |    |    |    |
| <b>ASML</b>  | N-acetylserotonin O-methyltransferase-like protein - Homo sapiens (Human)       |    |    |    |    |    |    |    |
| <b>ASSY</b>  | Argininosuccinate synthase - Homo sapiens (Human)                               |    |    |    |    |    | 1  |    |
| <b>AT131</b> | Probable cation-transporting ATPase 13A1 - Homo sapiens (Human)                 |    |    |    |    |    |    |    |
| <b>AT1A1</b> | (Human)                                                                         | 6  | 4  | 5  | 6  | 6  | 6  | 7  |
| <b>AT1B3</b> | Sodium/potassium-transporting ATPase subunit beta-3 - Homo sapiens (Human)      |    |    |    |    |    |    |    |
| <b>AT2B1</b> | Plasma membrane calcium-transporting ATPase 1 - Homo sapiens (Human)            |    | 4  |    |    |    |    |    |
| <b>AT2L1</b> | Alanine--glyoxylate aminotransferase 2-like 1 - Homo sapiens (Human)            |    |    |    |    |    | 2  |    |
| <b>ATE1</b>  | Arginyl-tRNA--protein transferase 1 - Homo sapiens (Human)                      |    |    |    |    |    |    | 1  |
| <b>ATPO</b>  | ATP synthase subunit O                                                          |    |    |    |    |    |    | 1  |
| <b>AXL</b>   | Tyrosine-protein kinase receptor UFO precursor - Homo sapiens (Human)           | 6  | 4  | 5  | 13 | 20 | 31 |    |
| <b>BAT2</b>  | Large proline-rich protein BAT2 - Homo sapiens (Human)                          |    |    | 1  |    |    |    |    |
| <b>BCAR1</b> | Breast cancer anti-estrogen resistance protein 1 - Homo sapiens (Human)         | 1  | 20 | 23 | 19 | 37 | 18 | 19 |
| <b>BCAR3</b> | Breast cancer anti-estrogen resistance protein 3 - Homo sapiens (Human)         |    |    | 2  | 4  | 6  | 3  |    |
| <b>BCDO1</b> | Beta,beta-carotene 15,15'-monooxygenase - Homo sapiens (Human)                  |    |    |    | 1  |    |    |    |



|              |                                                                                    |   |   |    |   |    |   |   |
|--------------|------------------------------------------------------------------------------------|---|---|----|---|----|---|---|
| <b>CDV3</b>  | Protein CDV3 homolog - Homo sapiens (Human)                                        | 3 | 2 | 6  | 8 | 10 | 5 | 1 |
| <b>CEBPB</b> | CCAAT/enhancer-binding protein beta - Homo sapiens (Human)                         |   |   | 2  |   |    |   |   |
| <b>CEL</b>   | Bile salt-activated lipase precursor - Homo sapiens (Human)                        |   |   | 1  |   |    |   |   |
| <b>CELR2</b> | Cadherin EGF LAG seven-pass G-type receptor 2 precursor - Homo sapiens (Human)     | 1 |   |    |   |    |   |   |
| <b>CENB2</b> | Centaurin-beta-2 - Homo sapiens (Human)                                            |   |   |    |   |    |   |   |
| <b>CEND1</b> | Centaurin-delta-1 - Homo sapiens (Human)                                           |   |   |    | 2 |    |   |   |
| <b>CF066</b> | UPF0240 protein C6orf66 - Homo sapiens (Human)                                     |   |   |    |   |    | 1 |   |
| <b>CF166</b> | Uncharacterized protein C6orf166 - Homo sapiens (Human)                            |   |   |    |   |    | 1 |   |
| <b>CF174</b> | Uncharacterized protein C6orf174 precursor - Homo sapiens (Human)                  |   |   |    |   |    |   |   |
| <b>CHADL</b> | Chondroadherin-like protein precursor - Homo sapiens (Human)                       |   |   |    |   |    |   |   |
| <b>CHIO</b>  | Beta-chimaerin - Homo sapiens (Human)                                              |   |   |    |   |    |   | 4 |
| <b>CHKB</b>  | Choline/ethanolamine kinase [Includes: Choline kinase beta - Homo sapiens (Human)] |   |   |    |   |    |   |   |
| <b>CHL1</b>  | Neural cell adhesion molecule L1-like protein precursor - Homo sapiens (Human)     |   |   |    |   | 1  |   |   |
| <b>CI078</b> | Uncharacterized protein C9orf78 - Homo sapiens (Human)                             |   |   |    |   |    |   |   |
| <b>CI093</b> | Uncharacterized protein C9orf93 - Homo sapiens (Human)                             |   |   |    | 1 |    |   |   |
| <b>CK052</b> | Uncharacterized protein C11orf52 - Homo sapiens (Human)                            |   |   |    |   |    |   | 5 |
| <b>CK059</b> | UPF0404 protein C11orf59 - Homo sapiens (Human)                                    | 3 | 3 |    | 2 | 4  | 4 | 5 |
| <b>CK5P3</b> | CDK5 regulatory subunit-associated protein 3 - Homo sapiens (Human)                |   |   |    | 1 |    |   |   |
| <b>CLAP2</b> | CLIP-associating protein 2 - Homo sapiens (Human)                                  |   |   |    |   |    |   | 2 |
| <b>CLD11</b> | Claudin-11 - Homo sapiens (Human)                                                  |   |   |    |   |    |   |   |
| <b>CLD5</b>  | Claudin-5 - Homo sapiens (Human)                                                   |   |   |    |   | 1  |   |   |
| <b>CLH1</b>  | Clathrin heavy chain 1 - Homo sapiens (Human)                                      | 2 | 5 |    | 2 | 9  | 7 |   |
| <b>CLOCK</b> | Circadian locomoter output cycles protein kaput - Homo sapiens (Human)             |   |   |    |   | 2  |   |   |
| <b>CN37</b>  | 2',3'-cyclic-nucleotide 3'-phosphodiesterase - Homo sapiens (Human)                | 4 |   |    |   |    |   |   |
| <b>CNN1</b>  | Calponin-1 - Homo sapiens (Human)                                                  |   |   |    |   | 7  |   |   |
| <b>CNN2</b>  | Calponin-2 - Homo sapiens (Human)                                                  | 4 | 4 |    | 3 | 4  | 2 |   |
| <b>CNN3</b>  | Calponin-3 - Homo sapiens (Human)                                                  | 6 | 4 |    | 3 | 9  | 3 |   |
| <b>CO4A</b>  | Complement C4-A precursor - Homo sapiens (Human)                                   |   |   |    |   |    |   |   |
| <b>CO9</b>   | Complement component C9b] - Homo sapiens (Human)                                   |   |   |    | 1 |    |   |   |
| <b>COBL</b>  | Protein cordon-bleu - Homo sapiens (Human)                                         |   | 4 |    |   |    |   |   |
| <b>COEA1</b> | Collagen alpha-1(XIV) chain precursor - Homo sapiens (Human)                       |   |   | 1  |   |    |   |   |
| <b>COF1</b>  | Cofilin-1 - Homo sapiens (Human)                                                   | 6 | 2 | 11 | 7 | 11 | 5 | 1 |
| <b>COPB</b>  | Coatomer subunit beta - Homo sapiens (Human)                                       |   |   |    |   |    |   |   |
| <b>CPSF6</b> | Cleavage and polyadenylation specificity factor subunit 6 - Homo sapiens (Human)   |   |   | 8  |   |    |   |   |
| <b>CRAC1</b> | Cartilage acidic protein 1 precursor - Homo sapiens (Human)                        |   |   |    | 1 |    |   |   |
| <b>CRCM1</b> | Calcium release-activated calcium channel protein 1 - Homo sapiens (Human)         |   | 2 |    |   |    |   |   |
| <b>CRIM1</b> | Cysteine-rich motor neuron 1 protein precursor - Homo sapiens (Human)              |   |   |    |   | 2  | 3 |   |

|              |                                                                                    |    |    |    |    |    |    |    |
|--------------|------------------------------------------------------------------------------------|----|----|----|----|----|----|----|
| <b>CRIP2</b> | Cysteine-rich protein 2 - Homo sapiens (Human)                                     | 4  | 4  |    |    | 2  | 5  | 13 |
| <b>CRK</b>   | Proto-oncogene C-crk - Homo sapiens (Human)                                        |    |    |    | 4  |    |    |    |
| <b>CRKL</b>  | Crk-like protein - Homo sapiens (Human)                                            | 1  |    |    | 2  | 3  | 2  | 2  |
| <b>CSK</b>   | Tyrosine-protein kinase CSK - Homo sapiens (Human)                                 |    |    |    |    |    |    |    |
| <b>CSKI2</b> | Caskin-2 - Homo sapiens (Human)                                                    | 2  |    |    | 2  | 4  |    | 4  |
| <b>CSPG4</b> | Chondroitin sulfate proteoglycan 4 precursor - Homo sapiens (Human)                | 2  |    |    |    |    |    |    |
| <b>CSRP1</b> | Cysteine and glycine-rich protein 1 - Homo sapiens (Human)                         |    |    |    |    |    |    | 1  |
| <b>CT012</b> | Ankyrin repeat-containing protein C20orf12 - Homo sapiens (Human)                  |    | 1  |    |    |    |    |    |
| <b>CT032</b> | HEF-like protein - Homo sapiens (Human)                                            |    | 8  |    |    |    |    |    |
| <b>CTL5</b>  | Choline transporter-like protein 5 - Homo sapiens (Human)                          |    |    |    |    |    |    |    |
| <b>CTLA4</b> | Cytotoxic T-lymphocyte protein 4 precursor - Homo sapiens (Human)                  |    |    |    | 1  |    |    |    |
| <b>CTNA1</b> | Catenin alpha-1 - Homo sapiens (Human)                                             |    |    |    | 1  | 1  | 3  | 1  |
| <b>CTNB1</b> | Catenin beta-1 - Homo sapiens (Human)                                              |    | 3  |    | 2  |    | 2  | 5  |
| <b>CTND1</b> | Catenin delta-1 - Homo sapiens (Human)                                             | 14 | 18 | 16 | 16 | 25 | 19 | 24 |
| <b>CTNL1</b> | Alpha-catulin - Homo sapiens (Human)                                               | 1  |    |    |    |    |    |    |
| <b>CXA1</b>  | Gap junction alpha-1 protein - Homo sapiens (Human)                                |    | 3  | 3  |    |    | 9  | 5  |
| <b>CXCR7</b> | C-X-C chemokine receptor type 7 - Homo sapiens (Human)                             |    |    |    |    |    | 2  |    |
| <b>CYR61</b> | Protein CYR61 precursor - Homo sapiens (Human)                                     |    |    |    | 1  |    |    |    |
| <b>DAB1</b>  | Disabled homolog 1 - Homo sapiens (Human)                                          |    |    |    |    |    |    | 3  |
| <b>DAB2</b>  | Disabled homolog 2 - Homo sapiens (Human)                                          | 3  |    |    |    |    | 1  |    |
| <b>DAPK3</b> | Death-associated protein kinase 3 - Homo sapiens (Human)                           |    |    |    |    |    | 1  |    |
| <b>DB125</b> | Beta-defensin 125 precursor - Homo sapiens (Human)                                 |    | 1  |    |    |    |    |    |
| <b>DBNL</b>  | Drebrin-like protein - Homo sapiens (Human)                                        | 5  | 5  | 4  | 4  | 4  | 4  | 5  |
| <b>DCBD1</b> | (Human)                                                                            | 2  | 1  | 8  |    |    | 3  | 3  |
| <b>DCBD2</b> | (Human)                                                                            |    | 15 | 12 | 22 | 4  | 10 | 9  |
| <b>DCP1B</b> | mRNA-decapping enzyme 1B - Homo sapiens (Human)                                    |    |    | 4  | 2  |    |    |    |
| <b>DDR1</b>  | Epithelial discoidin domain-containing receptor 1 precursor - Homo sapiens (Human) | 2  | 19 |    |    |    |    | 11 |
| <b>DDR2</b>  | Discoidin domain-containing receptor 2 precursor - Homo sapiens (Human)            | 19 | 4  | 1  | 2  | 2  | 8  | 9  |
| <b>DDX1</b>  | ATP-dependent RNA helicase DDX1 - Homo sapiens (Human)                             | 1  | 1  | 4  |    |    |    |    |
| <b>DDX17</b> | Probable ATP-dependent RNA helicase DDX17 - Homo sapiens (Human)                   |    |    |    |    | 2  |    |    |
| <b>DDX5</b>  | Probable ATP-dependent RNA helicase DDX5 - Homo sapiens (Human)                    |    |    |    | 1  |    |    |    |
| <b>DEF</b>   | Digestive organ expansion factor homolog - Homo sapiens (Human)                    |    |    |    |    |    |    |    |
| <b>DESM</b>  | Desmin - Homo sapiens (Human)                                                      |    | 1  |    |    |    |    |    |
| <b>DEST</b>  | Dextrin - Homo sapiens (Human)                                                     | 1  |    |    |    |    |    |    |
| <b>DHX33</b> | Putative ATP-dependent RNA helicase DHX33 - Homo sapiens (Human)                   |    |    |    |    |    | 1  |    |
| <b>DHX9</b>  | ATP-dependent RNA helicase A - Homo sapiens (Human)                                |    | 2  | 2  | 2  | 1  | 2  | 1  |
| <b>DIDO1</b> | Death-inducer obliterator 1 - Homo sapiens (Human)                                 |    |    | 1  | 3  |    | 1  | 1  |

|              |                                                                                      |    |    |    |    |    |   |    |
|--------------|--------------------------------------------------------------------------------------|----|----|----|----|----|---|----|
| <b>DLG3</b>  | Disks large homolog 3 - Homo sapiens (Human)                                         | 1  |    |    |    |    |   |    |
| <b>DLG5</b>  | Disks large homolog 5 - Homo sapiens (Human)                                         |    |    |    |    |    |   |    |
| <b>DLL1</b>  | Delta-like protein 1 precursor - Homo sapiens (Human)                                |    |    |    |    | 1  |   |    |
| <b>DNER</b>  | (Human)                                                                              | 10 |    |    |    |    |   | 12 |
| <b>DNHD2</b> | Dynein heavy chain domain-containing protein 2 - Homo sapiens (Human)                |    |    |    |    | 2  |   |    |
| <b>DNJB5</b> | DnaJ homolog subfamily B member 5 - Homo sapiens (Human)                             |    |    |    |    | 2  |   |    |
| <b>DNMBP</b> | Dynamin-binding protein - Homo sapiens (Human)                                       | 4  | 4  | 19 | 4  |    | 4 | 4  |
| <b>DOCK1</b> | Dedicator of cytokinesis protein 1 - Homo sapiens (Human)                            |    |    | 1  |    |    | 5 |    |
| <b>DOCK4</b> | Dedicator of cytokinesis protein 4 - Homo sapiens (Human)                            |    |    | 1  |    |    |   |    |
| <b>DOK1</b>  | Docking protein 1 - Homo sapiens (Human)                                             | 3  | 6  | 4  | 15 | 23 |   | 7  |
| <b>DPYL1</b> | Dihydropyrimidinase-related protein 1 - Homo sapiens (Human)                         |    | 4  |    | 4  |    |   | 4  |
| <b>DPYL2</b> | Dihydropyrimidinase-related protein 2 - Homo sapiens (Human)                         |    |    |    |    |    |   | 2  |
| <b>DSG1</b>  | Desmoglein-1 precursor - Homo sapiens (Human)                                        | 1  |    |    |    |    |   |    |
| <b>DSG2</b>  | Desmoglein-2 precursor - Homo sapiens (Human)                                        |    |    |    |    |    |   |    |
| <b>DUPD1</b> | Dual specificity phosphatase DUPD1 - Homo sapiens (Human)                            |    | 1  |    |    |    |   |    |
| <b>DYL1</b>  | Dynein light chain 1, cytoplasmic - Homo sapiens (Human)                             | 2  |    |    | 2  | 3  | 1 |    |
| <b>DYR1A</b> | Dual specificity tyrosine-phosphorylation-regulated kinase 1A - Homo sapiens (Human) | 16 | 14 | 6  | 1  | 19 | 7 | 15 |
| <b>DYRK2</b> | Dual specificity tyrosine-phosphorylation-regulated kinase 2 - Homo sapiens (Human)  |    | 4  | 4  | 4  | 6  | 4 |    |
| <b>DYRK3</b> | Dual specificity tyrosine-phosphorylation-regulated kinase 3 - Homo sapiens (Human)  |    | 4  |    |    |    |   | 1  |
| <b>DYSF</b>  | Dysferlin - Homo sapiens (Human)                                                     |    |    |    |    | 3  |   |    |
| <b>E41L2</b> | Band 4.1-like protein 2 - Homo sapiens (Human)                                       | 2  | 3  | 1  |    |    |   | 3  |
| <b>ECSIT</b> | Homo sapiens (Human)                                                                 |    |    | 1  |    |    |   |    |
| <b>EDC4</b>  | Enhancer of mRNA-decapping protein 4 - Homo sapiens (Human)                          |    |    | 1  |    |    |   |    |
| <b>EF1A1</b> | Elongation factor 1-alpha 1 - Homo sapiens (Human)                                   | 5  | 8  | 5  | 8  | 7  | 8 | 7  |
| <b>EF1A2</b> | Elongation factor 1-alpha 2 - Homo sapiens (Human)                                   | 1  |    |    | 4  |    |   |    |
| <b>EF2</b>   | Elongation factor 2 - Homo sapiens (Human)                                           |    |    | 1  |    |    |   |    |
| <b>EFHD2</b> | EF-hand domain-containing protein 2 - Homo sapiens (Human)                           |    |    |    | 1  |    |   |    |
| <b>EFNB1</b> | Ephrin-B1 precursor - Homo sapiens (Human)                                           | 7  |    | 2  | 2  | 10 | 2 | 29 |
| <b>EFNB2</b> | Ephrin-B2 precursor - Homo sapiens (Human)                                           |    |    |    |    | 9  |   |    |
| <b>EFNB3</b> | Ephrin-B3 precursor - Homo sapiens (Human)                                           | 10 |    |    | 4  |    |   | 1  |
| <b>EFS</b>   | Embryonal Fyn-associated substrate - Homo sapiens (Human)                            |    | 1  |    |    |    |   | 11 |
| <b>EGFR</b>  | Epidermal growth factor receptor precursor - Homo sapiens (Human)                    | 3  | 11 | 6  | 2  | 10 | 9 |    |
| <b>EGR2</b>  | Early growth response protein 2 - Homo sapiens (Human)                               |    |    |    | 1  |    |   |    |
| <b>EH1L1</b> | EH domain-binding protein 1-like protein 1 - Homo sapiens (Human)                    |    |    |    |    |    |   |    |
| <b>EIF2A</b> | Eukaryotic translation initiation factor 2A - Homo sapiens (Human)                   |    |    |    |    |    |   |    |
| <b>EIF3H</b> | Eukaryotic translation initiation factor 3 subunit H - Homo sapiens (Human)          |    |    |    |    | 1  |   |    |
| <b>ELAV1</b> | ELAV-like protein 1 - Homo sapiens (Human)                                           |    |    |    | 4  |    |   |    |

|              |                                                                            |    |    |    |    |    |    |    |
|--------------|----------------------------------------------------------------------------|----|----|----|----|----|----|----|
| <b>ELMO2</b> | Engulfment and cell motility protein 2 - Homo sapiens (Human)              | 4  | 2  | 4  | 2  | 1  | 4  |    |
| <b>ELP3</b>  | Elongator complex protein 3 - Homo sapiens (Human)                         |    |    | 1  |    |    | 1  |    |
| <b>EMD</b>   | Emerin - Homo sapiens (Human)                                              | 2  |    |    |    | 5  | 1  | 5  |
| <b>ENC2</b>  | Ectoderm-neural cortex protein 2 - Homo sapiens (Human)                    |    |    |    | 1  |    |    |    |
| <b>ENO1B</b> | Alpha-enolase - Homo sapiens (Human)                                       | 1  |    | 3  | 1  | 1  |    |    |
| <b>ENOA</b>  | Alpha-enolase - Homo sapiens (Human)                                       | 4  |    | 5  | 2  |    | 4  | 1  |
| <b>ENOG</b>  | Gamma-enolase - Homo sapiens (Human)                                       |    |    |    |    |    |    |    |
| <b>EPC2</b>  | Enhancer of polycomb homolog 2 - Homo sapiens (Human)                      |    | 2  |    |    | 2  |    |    |
| <b>EPHA2</b> | Ephrin type-A receptor 2 precursor - Homo sapiens (Human)                  | 33 | 14 | 9  | 11 | 23 | 8  | 22 |
| <b>EPHA3</b> | Ephrin type-A receptor 3 precursor - Homo sapiens (Human)                  | 1  |    |    | 3  | 4  | 4  | 14 |
| <b>EPHA4</b> | Ephrin type-A receptor 4 precursor - Homo sapiens (Human)                  |    |    |    |    |    |    | 7  |
| <b>EPHA5</b> | Ephrin type-A receptor 5 precursor - Homo sapiens (Human)                  |    |    |    |    | 19 | 13 | 7  |
| <b>EPHA7</b> | Ephrin type-A receptor 7 precursor - Homo sapiens (Human)                  | 4  | 19 |    |    |    | 2  | 2  |
| <b>EPHB1</b> | Ephrin type-B receptor 1 precursor - Homo sapiens (Human)                  |    |    |    |    | 10 | 4  | 2  |
| <b>EPHB2</b> | Ephrin type-B receptor 2 precursor - Homo sapiens (Human)                  |    |    |    |    | 15 |    | 2  |
| <b>EPHB3</b> | Ephrin type-B receptor 3 precursor - Homo sapiens (Human)                  | 6  | 12 |    |    | 13 |    | 8  |
| <b>EPHB4</b> | Ephrin type-B receptor 4 precursor - Homo sapiens (Human)                  | 12 | 1  | 5  |    | 15 | 1  | 14 |
| <b>EPS8</b>  | Epidermal growth factor receptor kinase substrate 8 - Homo sapiens (Human) |    | 4  | 3  | 3  | 2  | 4  | 3  |
| <b>ERP29</b> | Endoplasmic reticulum protein ERp29 precursor - Homo sapiens (Human)       |    |    |    |    |    | 1  | 1  |
| <b>ERRFI</b> | ERBB receptor feedback inhibitor 1 - Homo sapiens (Human)                  | 2  |    | 32 | 1  |    | 3  |    |
| <b>ESYT1</b> | Extended-synaptotagmin-1 - Homo sapiens (Human)                            | 4  | 2  |    | 1  | 1  | 4  |    |
| <b>ETFA</b>  | (Human)                                                                    |    |    |    |    | 1  |    |    |
| <b>EXOC2</b> | Exocyst complex component 2 - Homo sapiens (Human)                         |    |    |    |    |    | 1  |    |
| <b>EZRI</b>  | Ezrin - Homo sapiens (Human)                                               |    | 2  |    |    | 2  |    | 2  |
| <b>F101B</b> | Protein FAM101B - Homo sapiens (Human)                                     |    |    |    |    |    |    | 2  |
| <b>F105B</b> | Protein FAM105B - Homo sapiens (Human)                                     |    |    |    |    | 4  |    |    |
| <b>F111A</b> | Protein FAM111A - Homo sapiens (Human)                                     |    |    |    |    | 1  |    |    |
| <b>F111B</b> | Protein FAM111B - Homo sapiens (Human)                                     | 1  |    |    |    |    |    |    |
| <b>F120A</b> | UPF0318 protein FAM120A - Homo sapiens (Human)                             |    |    |    |    |    |    |    |
| <b>F92A1</b> | Protein FAM92A1 - Homo sapiens (Human)                                     | 1  |    |    |    |    |    |    |
| <b>FA50A</b> | Protein FAM50A - Homo sapiens (Human)                                      |    |    | 2  |    | 2  |    |    |
| <b>FA59A</b> | Protein FAM59A - Homo sapiens (Human)                                      |    |    | 4  | 4  | 4  |    | 4  |
| <b>FA69B</b> | Protein FAM69B - Homo sapiens (Human)                                      | 1  |    |    |    |    |    |    |
| <b>FA84A</b> | Protein FAM84A - Homo sapiens (Human)                                      |    |    |    |    |    | 2  |    |
| <b>FAK1</b>  | Focal adhesion kinase 1 - Homo sapiens (Human)                             | 21 | 16 | 33 | 32 | 39 | 36 | 36 |
| <b>FAK2</b>  | Protein tyrosine kinase 2 beta - Homo sapiens (Human)                      |    |    |    |    |    |    | 4  |
| <b>FANCI</b> | Fanconi anemia group J protein - Homo sapiens (Human)                      |    |    |    |    |    |    |    |

|              |                                                                                 |    |    |    |    |    |    |    |
|--------------|---------------------------------------------------------------------------------|----|----|----|----|----|----|----|
| <b>FATH</b>  | Cadherin-related tumor suppressor homolog precursor - Homo sapiens (Human)      | 6  | 2  |    |    |    |    | 1  |
| <b>FBX31</b> | F-box only protein 31 - Homo sapiens (Human)                                    |    |    |    | 1  |    |    |    |
| <b>FCSD2</b> | FCH and double SH3 domains protein 2 - Homo sapiens (Human)                     |    |    |    |    | 2  |    |    |
| <b>FER</b>   | Proto-oncogene tyrosine-protein kinase FER - Homo sapiens (Human)               | 2  |    |    | 3  |    |    |    |
| <b>FGD6</b>  | FYVE, RhoGEF and PH domain-containing protein 6 - Homo sapiens (Human)          |    | 2  |    |    |    |    |    |
| <b>FGFR1</b> | Basic fibroblast growth factor receptor 1 precursor - Homo sapiens (Human)      | 34 | 8  | 4  | 13 | 8  | 31 | 8  |
| <b>FGFR2</b> | Fibroblast growth factor receptor 2 precursor - Homo sapiens (Human)            |    |    |    | 2  | 2  |    |    |
| <b>FGFR3</b> | Fibroblast growth factor receptor 3 precursor - Homo sapiens (Human)            |    |    |    |    |    |    | 1  |
| <b>FGFR4</b> | Fibroblast growth factor receptor 4 precursor - Homo sapiens (Human)            |    | 3  |    | 4  |    | 7  |    |
| <b>FGRL1</b> | Fibroblast growth factor receptor-like 1 precursor - Homo sapiens (Human)       | 1  |    |    |    |    | 1  |    |
| <b>FIP1</b>  | Pre-mRNA 3'-end-processing factor FIP1 - Homo sapiens (Human)                   |    |    |    |    |    | 1  |    |
| <b>FLNA</b>  | Filamin-A - Homo sapiens (Human)                                                |    |    |    |    | 2  |    |    |
| <b>FLNB</b>  | Filamin-B - Homo sapiens (Human)                                                |    |    | 2  |    | 1  | 1  | 1  |
| <b>FLNC</b>  | Filamin-C - Homo sapiens (Human)                                                |    | 2  |    |    |    |    |    |
| <b>FLOT1</b> | Flotillin-1 - Homo sapiens (Human)                                              | 10 | 2  |    | 2  | 19 |    |    |
| <b>FOSB</b>  | Protein fosB - Homo sapiens (Human)                                             |    |    |    |    |    |    |    |
| <b>FRMD6</b> | FERM domain-containing protein 6 - Homo sapiens (Human)                         |    |    |    |    |    |    |    |
| <b>FRS2</b>  | Fibroblast growth factor receptor substrate 2 - Homo sapiens (Human)            | 8  | 7  | 1  | 8  | 8  | 8  | 6  |
| <b>FUBP1</b> | Far upstream element-binding protein 1 - Homo sapiens (Human)                   |    |    |    |    |    |    |    |
| <b>FYN</b>   | Proto-oncogene tyrosine-protein kinase Fyn - Homo sapiens (Human)               | 26 | 17 | 10 | 13 | 8  | 11 | 15 |
| <b>G6PD</b>  | Glucose-6-phosphate 1-dehydrogenase - Homo sapiens (Human)                      |    |    |    | 8  | 9  | 3  | 9  |
| <b>GAB1</b>  | GRB2-associated-binding protein 1 - Homo sapiens (Human)                        | 11 | 15 | 14 | 10 | 22 | 3  | 39 |
| <b>GAB2</b>  | GRB2-associated-binding protein 2 - Homo sapiens (Human)                        |    |    |    |    |    |    | 2  |
| <b>GAGE3</b> | G antigen 3 - Homo sapiens (Human)                                              |    | 3  |    |    |    |    |    |
| <b>GAK</b>   | Cyclin G-associated kinase - Homo sapiens (Human)                               |    |    |    |    |    |    |    |
| <b>GBB3</b>  | (Human)                                                                         |    |    | 1  |    |    |    |    |
| <b>GCFC</b>  | GC-rich sequence DNA-binding factor homolog - Homo sapiens (Human)              |    |    |    |    |    |    |    |
| <b>GFPT1</b> | (Human)                                                                         |    |    |    |    | 1  |    |    |
| <b>GIDRP</b> | Growth inhibition and differentiation-related protein 88 - Homo sapiens (Human) |    |    |    |    |    |    |    |
| <b>GIT1</b>  | ARF GTPase-activating protein GIT1 - Homo sapiens (Human)                       | 2  | 1  | 1  | 4  | 4  | 2  | 4  |
| <b>GNAL</b>  | Guanine nucleotide-binding protein G(olf) subunit alpha - Homo sapiens (Human)  | 2  |    |    |    |    |    |    |
| <b>GNAS1</b> | (Human)                                                                         | 14 |    |    |    |    |    |    |
| <b>GOGA3</b> | Golgin subfamily A member 3 - Homo sapiens (Human)                              |    |    |    |    |    |    |    |
| <b>GOGA4</b> | Golgin subfamily A member 4 - Homo sapiens (Human)                              |    |    |    |    | 2  |    |    |
| <b>GOGA5</b> | Golgin subfamily A member 5 - Homo sapiens (Human)                              |    |    |    |    |    |    |    |
| <b>GP126</b> | Probable G-protein coupled receptor 126 precursor - Homo sapiens (Human)        |    |    |    |    |    |    |    |
| <b>GPC5C</b> | (Human)                                                                         | 2  |    | 12 |    |    |    |    |



|               |                                                                                     |    |    |    |    |    |    |    |
|---------------|-------------------------------------------------------------------------------------|----|----|----|----|----|----|----|
| <b>GPSM3</b>  | G-protein-signaling modulator 3 - Homo sapiens (Human)                              |    |    |    |    |    |    |    |
| <b>GRB10</b>  | Growth factor receptor-bound protein 10 - Homo sapiens (Human)                      |    |    | 1  |    |    |    | 2  |
| <b>GRDN</b>   | Girdin - Homo sapiens (Human)                                                       |    |    |    | 1  | 2  |    |    |
| <b>GRLF1</b>  | Glucocorticoid receptor DNA-binding factor 1 - Homo sapiens (Human)                 | 13 | 7  | 11 | 10 | 9  | 9  | 10 |
| <b>GRM1</b>   | Metabotropic glutamate receptor 1 precursor - Homo sapiens (Human)                  |    |    |    | 1  |    |    |    |
| <b>GRTP1</b>  | Growth hormone-regulated TBC protein 1 - Homo sapiens (Human)                       |    |    |    |    |    |    |    |
| <b>GSK3A</b>  | Glycogen synthase kinase-3 alpha - Homo sapiens (Human)                             | 21 | 24 | 13 | 13 | 37 | 33 | 15 |
| <b>GSTP1</b>  | Glutathione S-transferase P - Homo sapiens (Human)                                  |    |    | 2  |    |    |    |    |
| <b>GTF2I</b>  | General transcription factor II-I - Homo sapiens (Human)                            |    |    | 4  |    |    |    |    |
| <b>H2B1C</b>  | Histone H2B type 1-C/E/F/G/I - Homo sapiens (Human)                                 | 6  |    | 2  | 5  |    |    | 2  |
| <b>H4</b>     | Histone H4 - Homo sapiens (Human)                                                   |    | 3  | 1  |    |    |    | 1  |
| <b>HCK</b>    | Tyrosine-protein kinase HCK - Homo sapiens (Human)                                  |    |    | 4  | 4  | 2  | 4  | 6  |
| <b>HDGF</b>   | Hepatoma-derived growth factor - Homo sapiens (Human)                               |    |    | 1  |    |    |    |    |
| <b>HEG1</b>   | Protein HEG homolog 1 precursor - Homo sapiens (Human)                              | 1  |    |    |    | 5  | 5  |    |
| <b>HELLC1</b> | Activating signal cointegrator 1 complex subunit 3 - Homo sapiens (Human)           |    | 1  |    |    |    |    |    |
| <b>HELLS</b>  | Lymphoid-specific helicase - Homo sapiens (Human)                                   | 1  | 1  |    |    |    |    |    |
| <b>HELZ</b>   | Probable helicase with zinc finger domain - Homo sapiens (Human)                    |    |    |    |    | 4  |    |    |
| <b>HGS</b>    | Hepatocyte growth factor-regulated tyrosine kinase substrate - Homo sapiens (Human) | 7  | 1  | 3  | 6  | 7  | 7  | 1  |
| <b>HIPK1</b>  | Homeodomain-interacting protein kinase 1 - Homo sapiens (Human)                     | 12 | 12 | 6  | 4  | 8  | 8  | 9  |
| <b>HIPK3</b>  | Homeodomain-interacting protein kinase 3 - Homo sapiens (Human)                     | 3  | 8  | 4  | 4  | 4  | 4  | 5  |
| <b>HNRH1</b>  | Heterogeneous nuclear ribonucleoprotein H - Homo sapiens (Human)                    |    |    | 6  |    |    |    | 2  |
| <b>HNRH3</b>  | Heterogeneous nuclear ribonucleoprotein H3 - Homo sapiens (Human)                   |    |    | 8  | 1  | 2  |    | 2  |
| <b>HNRL1</b>  | Heterogeneous nuclear ribonucleoprotein U-like protein 1 - Homo sapiens (Human)     | 2  |    |    |    | 2  |    |    |
| <b>HNRL2</b>  | Heterogeneous nuclear ribonucleoprotein U-like protein 2 - Homo sapiens (Human)     |    |    | 2  |    |    |    |    |
| <b>HNRPC</b>  | Heterogeneous nuclear ribonucleoproteins C1/C2 - Homo sapiens (Human)               | 1  |    | 4  | 1  | 1  |    |    |
| <b>HNRPF</b>  | Heterogeneous nuclear ribonucleoprotein F - Homo sapiens (Human)                    | 2  | 3  | 6  | 1  | 1  | 2  | 2  |
| <b>HNRPG</b>  | Heterogeneous nuclear ribonucleoprotein G - Homo sapiens (Human)                    |    | 1  | 8  |    | 1  |    |    |
| <b>HNRPK</b>  | Heterogeneous nuclear ribonucleoprotein K - Homo sapiens (Human)                    |    |    |    |    |    |    | 1  |
| <b>HNRPM</b>  | Heterogeneous nuclear ribonucleoprotein M - Homo sapiens (Human)                    |    |    | 4  |    | 1  |    |    |
| <b>HNRPR</b>  | Heterogeneous nuclear ribonucleoprotein R - Homo sapiens (Human)                    |    |    | 9  | 1  | 1  |    | 2  |
| <b>HNRPU</b>  | Heterogeneous nuclear ribonucleoprotein U - Homo sapiens (Human)                    |    |    | 3  |    |    |    |    |
| <b>HORN</b>   | Hornerin - Homo sapiens (Human)                                                     |    |    | 4  |    |    |    |    |
| <b>HS71L</b>  | Heat shock 70 kDa protein 1L - Homo sapiens (Human)                                 |    | 2  | 3  | 3  | 2  |    |    |
| <b>HS90A</b>  | Heat shock protein HSP 90-alpha - Homo sapiens (Human)                              |    | 1  | 3  | 3  | 3  | 1  |    |
| <b>HS90B</b>  | Heat shock protein HSP 90-beta - Homo sapiens (Human)                               | 4  | 11 | 6  | 12 | 11 | 11 | 2  |
| <b>HSP71</b>  | Heat shock 70 kDa protein 1 - Homo sapiens (Human)                                  |    |    |    | 2  | 1  |    |    |
| <b>HSP72</b>  | Heat shock-related 70 kDa protein 2 - Homo sapiens (Human)                          |    |    |    |    |    |    |    |

|              |                                                                                    |    |    |   |    |    |   |    |
|--------------|------------------------------------------------------------------------------------|----|----|---|----|----|---|----|
| <b>HSP74</b> | Heat shock 70 kDa protein 4 - Homo sapiens (Human)                                 |    |    |   |    |    |   |    |
| <b>HSP7C</b> | Heat shock cognate 71 kDa protein - Homo sapiens (Human)                           |    | 1  | 2 | 2  | 1  |   |    |
| <b>HTF9C</b> | Hpall tiny fragments locus 9c protein - Homo sapiens (Human)                       |    |    |   |    |    |   |    |
| <b>IASPP</b> | RelA-associated inhibitor - Homo sapiens (Human)                                   |    |    |   | 2  |    |   |    |
| <b>IBTK</b>  | Inhibitor of Bruton tyrosine kinase - Homo sapiens (Human)                         |    |    |   |    |    |   | 2  |
| <b>ICB1</b>  | Induced by contact to basement membrane 1 protein - Homo sapiens (Human)           |    |    |   |    |    |   |    |
| <b>IF2A</b>  | Eukaryotic translation initiation factor 2 subunit 1 - Homo sapiens (Human)        |    |    |   | 1  |    |   |    |
| <b>IF4H</b>  | Eukaryotic translation initiation factor 4H - Homo sapiens (Human)                 | 2  |    |   | 2  | 1  | 2 | 3  |
| <b>IFIT2</b> | Interferon-induced protein with tetratricopeptide repeats 2 - Homo sapiens (Human) |    | 3  |   |    |    |   |    |
| <b>IGF1R</b> | Insulin-like growth factor 1 receptor precursor - Homo sapiens (Human)             | 3  | 12 |   | 11 | 14 | 7 | 6  |
| <b>IL6RB</b> | Interleukin-6 receptor subunit beta precursor - Homo sapiens (Human)               |    |    |   |    |    | 1 |    |
| <b>ILF3</b>  | Interleukin enhancer-binding factor 3 - Homo sapiens (Human)                       |    |    |   | 6  |    |   |    |
| <b>INCE</b>  | Inner centromere protein - Homo sapiens (Human)                                    |    |    |   |    | 5  | 5 | 1  |
| <b>INGR1</b> | Interferon-gamma receptor alpha chain precursor - Homo sapiens (Human)             |    |    |   |    | 1  |   | 14 |
| <b>INSR</b>  | Insulin receptor precursor - Homo sapiens (Human)                                  |    |    |   |    |    |   |    |
| <b>IQGA1</b> | Ras GTPase-activating-like protein IQGAP1 - Homo sapiens (Human)                   |    |    |   |    | 2  | 4 |    |
| <b>IRS1</b>  | Insulin receptor substrate 1 - Homo sapiens (Human)                                |    | 1  |   | 7  | 13 | 8 | 2  |
| <b>IRS2</b>  | Insulin receptor substrate 2 - Homo sapiens (Human)                                |    |    |   |    | 3  |   | 23 |
| <b>ITA7</b>  | chain] - Homo sapiens (Human)                                                      |    |    |   |    |    |   | 1  |
| <b>ITB1</b>  | Integrin beta-1 precursor - Homo sapiens (Human)                                   | 4  | 2  | 3 | 2  | 2  | 4 | 2  |
| <b>ITB5</b>  | Integrin beta-5 precursor - Homo sapiens (Human)                                   | 1  |    |   | 1  | 2  | 5 | 5  |
| <b>ITSN2</b> | Intersectin-2 - Homo sapiens (Human)                                               | 8  | 10 | 3 | 4  | 9  | 8 | 4  |
| <b>JAK1</b>  | Tyrosine-protein kinase JAK1 - Homo sapiens (Human)                                | 3  | 3  | 1 |    | 7  | 2 | 7  |
| <b>JAK2</b>  | Tyrosine-protein kinase JAK2 - Homo sapiens (Human)                                | 11 | 3  |   | 3  | 4  | 1 | 5  |
| <b>JAK3</b>  | Tyrosine-protein kinase JAK3 - Homo sapiens (Human)                                |    |    |   | 1  |    |   |    |
| <b>JAM3</b>  | Junctional adhesion molecule C precursor - Homo sapiens (Human)                    | 1  | 1  |   |    |    |   |    |
| <b>JUNB</b>  | Transcription factor jun-B - Homo sapiens (Human)                                  |    |    |   | 1  |    |   |    |
| <b>K0460</b> | Uncharacterized protein KIAA0460 - Homo sapiens (Human)                            |    |    |   | 6  |    |   |    |
| <b>K0692</b> | ANK repeat and LEM domain-containing protein KIAA0692 - Homo sapiens (Human)       |    |    |   |    |    |   |    |
| <b>K1143</b> | Uncharacterized protein KIAA1143 - Homo sapiens (Human)                            |    |    |   |    | 3  |   |    |
| <b>K1430</b> | UPF0501 protein KIAA1430 - Homo sapiens (Human)                                    |    |    |   |    |    |   |    |
| <b>K1849</b> | Uncharacterized protein KIAA1849 - Homo sapiens (Human)                            |    |    |   |    |    |   | 2  |
| <b>K1946</b> | Uncharacterized protein KIAA1946 precursor - Homo sapiens (Human)                  |    | 2  |   |    |    |   |    |
| <b>K1C18</b> | Keratin, type I cytoskeletal 18 - Homo sapiens (Human)                             |    |    | 2 | 3  |    |   |    |
| <b>K1C24</b> | Keratin, type I cytoskeletal 24 - Homo sapiens (Human)                             |    | 1  |   | 1  |    | 1 |    |
| <b>K2C5</b>  | Keratin, type II cytoskeletal 5 - Homo sapiens (Human)                             |    |    |   |    | 1  |   |    |
| <b>KAPCB</b> | Keratin, type II cytoskeletal 5 - Homo sapiens (Human)                             | 1  | 1  |   |    | 1  |   |    |



|              |                                                                                        |   |    |    |    |    |    |    |
|--------------|----------------------------------------------------------------------------------------|---|----|----|----|----|----|----|
| <b>LONM</b>  | Lon protease homolog, mitochondrial precursor - Homo sapiens (Human)                   | 1 | 2  |    |    |    |    | 2  |
| <b>LPHN2</b> | Latrophilin-2 precursor - Homo sapiens (Human)                                         |   | 13 |    | 3  |    |    |    |
| <b>LPP</b>   | Lipoma-preferred partner - Homo sapiens (Human)                                        | 4 | 4  | 4  | 7  | 7  | 5  | 4  |
| <b>LPXN</b>  | Leupaxin - Homo sapiens (Human)                                                        |   |    |    | 2  |    | 1  |    |
| <b>LQK1</b>  | Putative uncharacterized protein LQK1 - Homo sapiens (Human)                           |   |    |    |    |    | 1  |    |
| <b>LRCH2</b> | (Human)                                                                                | 1 |    |    |    |    |    |    |
| <b>LRIG2</b> | sapiens (Human)                                                                        |   | 2  |    |    |    |    |    |
| <b>LRIG3</b> | sapiens (Human)                                                                        |   | 1  |    |    | 1  | 1  |    |
| <b>LRP1</b>  | Prolow-density lipoprotein receptor-related protein 1 precursor - Homo sapiens (Human) |   |    |    |    |    | 2  |    |
| <b>LRP1B</b> | Low-density lipoprotein receptor-related protein 1B precursor - Homo sapiens (Human)   |   |    |    |    |    |    | 4  |
| <b>LSR</b>   | Lipolysis-stimulated lipoprotein receptor - Homo sapiens (Human)                       |   |    |    | 4  |    |    |    |
| <b>M3K15</b> | Mitogen-activated protein kinase kinase kinase 15 - Homo sapiens (Human)               | 1 |    |    |    |    |    |    |
| <b>M3K4</b>  | Mitogen-activated protein kinase kinase kinase 4 - Homo sapiens (Human)                |   |    |    |    | 1  |    |    |
| <b>M3K8</b>  | Mitogen-activated protein kinase kinase kinase 8 - Homo sapiens (Human)                |   | 1  |    |    |    |    |    |
| <b>MA1B1</b> | sapiens (Human)                                                                        |   |    |    |    | 1  |    |    |
| <b>MAGD1</b> | Melanoma-associated antigen D1 - Homo sapiens (Human)                                  |   |    |    |    |    |    | 4  |
| <b>MAK</b>   | Serine/threonine-protein kinase MAK - Homo sapiens (Human)                             | 1 |    |    |    |    |    |    |
| <b>MANEL</b> | Glycoprotein endo-alpha-1,2-mannosidase-like protein - Homo sapiens (Human)            | 2 |    |    |    |    |    |    |
| <b>MAP1B</b> | Microtubule-associated protein 1B - Homo sapiens (Human)                               | 2 |    |    | 1  |    | 2  | 14 |
| <b>MAP2</b>  | Microtubule-associated protein 2 - Homo sapiens (Human)                                |   |    |    | 1  |    |    |    |
| <b>MARK2</b> | Serine/threonine-protein kinase MARK2 - Homo sapiens (Human)                           |   |    |    | 1  |    |    |    |
| <b>MATR3</b> | Matrin-3 - Homo sapiens (Human)                                                        |   |    |    | 4  |    |    |    |
| <b>MCA32</b> | Probable mast cell antigen 32 homolog precursor - Homo sapiens (Human)                 |   |    |    |    |    |    |    |
| <b>MCEM1</b> | Mast cell-expressed membrane protein 1 - Homo sapiens (Human)                          |   |    |    |    |    |    | 4  |
| <b>MDN1</b>  | Midasin - Homo sapiens (Human)                                                         |   |    |    |    |    |    | 2  |
| <b>MEG10</b> | Multiple epidermal growth factor-like domains 10 precursor - Homo sapiens (Human)      |   | 24 |    |    |    |    |    |
| <b>MELK</b>  | Maternal embryonic leucine zipper kinase - Homo sapiens (Human)                        | 1 |    |    |    |    |    |    |
| <b>MERTK</b> | Proto-oncogene tyrosine-protein kinase MER precursor - Homo sapiens (Human)            | 6 | 1  | 2  |    | 5  | 5  | 12 |
| <b>MET</b>   | Hepatocyte growth factor receptor precursor - Homo sapiens (Human)                     |   | 18 | 32 | 8  | 23 | 11 |    |
| <b>MGN2</b>  | Protein mago nashi homolog 2 - Homo sapiens (Human)                                    |   | 4  |    |    |    |    |    |
| <b>MGST1</b> | Microsomal glutathione S-transferase 1 - Homo sapiens (Human)                          |   |    |    |    |    |    | 1  |
| <b>MIB2</b>  | E3 ubiquitin-protein ligase MIB2 - Homo sapiens (Human)                                |   | 1  |    |    |    |    |    |
| <b>MINK1</b> | Misshapen-like kinase 1 - Homo sapiens (Human)                                         |   |    |    |    |    |    |    |
| <b>MK01</b>  | Mitogen-activated protein kinase 1 - Homo sapiens (Human)                              | 9 | 4  | 3  | 12 | 8  | 6  | 8  |
| <b>MK03</b>  | Mitogen-activated protein kinase 3 - Homo sapiens (Human)                              | 6 |    |    | 3  | 3  | 4  | 5  |
| <b>MK07</b>  | Mitogen-activated protein kinase 7 - Homo sapiens (Human)                              |   |    |    | 2  |    | 3  |    |
| <b>MK08</b>  | Mitogen-activated protein kinase 8 - Homo sapiens (Human)                              |   |    |    | 4  | 1  |    | 2  |

|              |                                                                                    |    |    |   |    |    |    |    |
|--------------|------------------------------------------------------------------------------------|----|----|---|----|----|----|----|
| <b>MK09</b>  | Mitogen-activated protein kinase 9 - Homo sapiens (Human)                          |    | 2  | 1 |    | 1  | 2  |    |
| <b>MK11</b>  | Mitogen-activated protein kinase 11 - Homo sapiens (Human)                         |    |    |   |    |    | 1  |    |
| <b>MK12</b>  | Mitogen-activated protein kinase 12 - Homo sapiens (Human)                         | 1  | 1  |   | 3  | 2  | 3  | 1  |
| <b>MK13</b>  | Mitogen-activated protein kinase 13 - Homo sapiens (Human)                         |    |    |   |    |    |    | 4  |
| <b>MK14</b>  | Mitogen-activated protein kinase 14 - Homo sapiens (Human)                         | 11 | 10 | 7 | 17 | 21 | 17 | 14 |
| <b>MMP14</b> | Matrix metalloproteinase-14 precursor - Homo sapiens (Human)                       |    |    |   |    | 1  |    |    |
| <b>MOES</b>  | Moesin - Homo sapiens (Human)                                                      |    | 1  |   |    |    |    | 1  |
| <b>MPP5</b>  | MAGUK p55 subfamily member 5 - Homo sapiens (Human)                                | 1  |    |   |    |    |    |    |
| <b>MPZL1</b> | Myelin protein zero-like protein 1 precursor - Homo sapiens (Human)                | 17 | 5  | 6 | 8  | 10 | 10 | 8  |
| <b>MRIP</b>  | Myosin phosphatase Rho-interacting protein - Homo sapiens (Human)                  |    |    |   |    |    |    |    |
| <b>MTMRA</b> | Myotubularin-related protein 10 - Homo sapiens (Human)                             | 4  |    |   |    |    |    |    |
| <b>MUC7</b>  | Mucin-7 precursor - Homo sapiens (Human)                                           |    |    | 1 |    |    | 1  |    |
| <b>MUSK</b>  | Muscle, skeletal receptor tyrosine protein kinase precursor - Homo sapiens (Human) |    | 6  |   |    |    |    |    |
| <b>MXRA5</b> | Matrix-remodeling-associated protein 5 precursor - Homo sapiens (Human)            | 1  |    |   |    |    |    | 1  |
| <b>MYH10</b> | Myosin-10 - Homo sapiens (Human)                                                   |    |    | 2 |    | 1  |    | 1  |
| <b>MYH14</b> | Myosin-14 - Homo sapiens (Human)                                                   |    | 1  |   |    |    |    |    |
| <b>MYH3</b>  | Myosin-3 - Homo sapiens (Human)                                                    |    | 2  |   |    |    |    |    |
| <b>MYH6</b>  | Myosin-6 - Homo sapiens (Human)                                                    |    |    |   |    |    |    |    |
| <b>MYH9</b>  | Myosin-9 - Homo sapiens (Human)                                                    | 2  |    | 1 | 6  | 7  | 5  |    |
| <b>MYLK</b>  | Myosin light chain kinase, smooth muscle - Homo sapiens (Human)                    |    |    |   |    | 2  |    |    |
| <b>MYO10</b> | Myosin-X - Homo sapiens (Human)                                                    |    |    |   |    |    |    | 3  |
| <b>MYO1B</b> | Myosin-Ib - Homo sapiens (Human)                                                   | 1  |    |   |    |    |    |    |
| <b>MYO1E</b> | Myosin-Ie - Homo sapiens (Human)                                                   | 2  | 2  | 4 |    | 7  | 2  |    |
| <b>MYPT1</b> | Protein phosphatase 1 regulatory subunit 12A - Homo sapiens (Human)                |    | 1  |   | 2  | 7  | 6  | 4  |
| <b>N4BP2</b> | NEDD4-binding protein 2 - Homo sapiens (Human)                                     |    |    |   |    |    |    | 1  |
| <b>NCK1</b>  | Cytoplasmic protein NCK1 - Homo sapiens (Human)                                    | 1  |    | 4 |    | 4  |    | 3  |
| <b>NCK2</b>  | Cytoplasmic protein NCK2 - Homo sapiens (Human)                                    |    |    |   |    | 4  |    |    |
| <b>NCKX1</b> | Sodium/potassium/calcium exchanger 1 - Homo sapiens (Human)                        |    |    |   |    |    |    | 1  |
| <b>NCOR2</b> | Nuclear receptor corepressor 2 - Homo sapiens (Human)                              |    |    | 1 |    |    |    |    |
| <b>NEB2</b>  | Neurabin-2 - Homo sapiens (Human)                                                  |    |    |   |    | 1  |    |    |
| <b>NEBU</b>  | Nebulin - Homo sapiens (Human)                                                     |    |    |   |    |    |    |    |
| <b>NFYA</b>  | Nuclear transcription factor Y subunit alpha - Homo sapiens (Human)                |    |    | 4 |    |    |    |    |
| <b>NOSIP</b> | Nitric oxide synthase-interacting protein - Homo sapiens (Human)                   |    |    |   |    |    |    | 2  |
| <b>NOTC1</b> | Neurogenic locus notch homolog protein 1 precursor - Homo sapiens (Human)          |    |    |   |    |    |    |    |
| <b>NOTC2</b> | Neurogenic locus notch homolog protein 2 precursor - Homo sapiens (Human)          |    |    |   |    | 4  | 3  |    |
| <b>NPDC1</b> | (Human)                                                                            | 2  |    |   |    |    |    |    |
| <b>NRP1</b>  | Neuropilin-1 precursor - Homo sapiens (Human)                                      |    |    | 4 |    | 2  |    | 2  |



|              |                                                                                     |    |   |    |   |    |    |    |
|--------------|-------------------------------------------------------------------------------------|----|---|----|---|----|----|----|
| <b>PCDH7</b> | Protocadherin-7 precursor - Homo sapiens (Human)                                    |    | 4 | 1  |   |    |    | 5  |
| <b>PCTK1</b> | Serine/threonine-protein kinase PCTAIRE-1 - Homo sapiens (Human)                    |    |   |    | 1 |    |    |    |
| <b>PCTK1</b> | Serine/threonine-protein kinase PCTAIRE-1 - Homo sapiens (Human)                    | 1  |   |    |   |    |    | 1  |
| <b>PDC6I</b> | Programmed cell death 6-interacting protein - Homo sapiens (Human)                  |    |   |    |   |    | 2  |    |
| <b>PDLI1</b> | PDZ and LIM domain protein 1 - Homo sapiens (Human)                                 |    |   |    |   |    | 1  |    |
| <b>PDLI3</b> | PDZ and LIM domain protein 3 - Homo sapiens (Human)                                 |    | 1 |    |   |    |    |    |
| <b>PDLI5</b> | PDZ and LIM domain protein 5 - Homo sapiens (Human)                                 |    | 5 | 4  | 3 | 9  | 4  | 4  |
| <b>PDZ11</b> | PDZ domain-containing protein 11 - Homo sapiens (Human)                             | 7  |   |    |   |    |    |    |
| <b>PEG3</b>  | Paternally-expressed gene 3 protein - Homo sapiens (Human)                          | 2  |   |    |   |    |    |    |
| <b>PELI1</b> | Protein pellino homolog 1 - Homo sapiens (Human)                                    |    |   | 1  |   |    |    |    |
| <b>PERI</b>  | Peripherin - Homo sapiens (Human)                                                   | 1  |   |    |   |    |    |    |
| <b>PERP</b>  | p53 apoptosis effector related to PMP-22 - Homo sapiens (Human)                     | 1  |   |    |   |    |    |    |
| <b>PFTK1</b> | Serine/threonine-protein kinase PFTAIRE-1 - Homo sapiens (Human)                    |    |   |    |   |    |    | 2  |
| <b>PFTK1</b> | Serine/threonine-protein kinase PFTAIRE-1 - Homo sapiens (Human)                    |    |   |    |   |    |    | 1  |
| <b>PGAM1</b> | Phosphoglycerate mutase 1 - Homo sapiens (Human)                                    |    | 7 | 7  |   | 2  | 4  | 1  |
| <b>PGFRA</b> | Alpha-type platelet-derived growth factor receptor precursor - Homo sapiens (Human) | 37 |   | 13 | 2 | 14 | 27 |    |
| <b>PGK1</b>  | Phosphoglycerate kinase 1 - Homo sapiens (Human)                                    |    |   | 3  |   | 2  |    |    |
| <b>PGM1</b>  | Phosphoglucomutase-1 - Homo sapiens (Human)                                         |    |   | 4  |   | 3  |    |    |
| <b>PGM2L</b> | Phosphoglucomutase-2-like 1 - Homo sapiens (Human)                                  |    |   |    |   |    | 1  |    |
| <b>PHLB2</b> | Pleckstrin homology-like domain family B member 2 - Homo sapiens (Human)            |    | 1 |    |   |    |    |    |
| <b>PHP14</b> | 14 kDa phosphohistidine phosphatase - Homo sapiens (Human)                          |    |   | 3  |   | 1  |    |    |
| <b>PHTNS</b> | Phostensin - Homo sapiens (Human)                                                   |    |   |    |   | 2  |    |    |
| <b>PIGN</b>  | GPI ethanolamine phosphate transferase 1 - Homo sapiens (Human)                     |    |   |    |   |    | 1  |    |
| <b>PIN4</b>  | Peptidyl-prolyl cis-trans isomerase NIMA-interacting 4 - Homo sapiens (Human)       | 5  |   |    |   |    |    |    |
| <b>PITM1</b> | Membrane-associated phosphatidylinositol transfer protein 1 - Homo sapiens (Human)  |    | 1 |    |   |    |    |    |
| <b>PIWL2</b> | Piwi-like protein 2 - Homo sapiens (Human)                                          |    |   |    |   |    | 1  |    |
| <b>PK3CA</b> | sapiens (Human)                                                                     | 3  |   |    |   |    |    |    |
| <b>PK3CB</b> | sapiens (Human)                                                                     |    |   |    |   |    | 3  |    |
| <b>PKHA3</b> | Pleckstrin homology domain-containing family A member 3 - Homo sapiens (Human)      |    |   |    |   |    | 1  |    |
| <b>PKHA5</b> | Pleckstrin homology domain-containing family A member 5 - Homo sapiens (Human)      |    |   |    |   | 3  |    |    |
| <b>PKHA6</b> | Pleckstrin homology domain-containing family A member 6 - Homo sapiens (Human)      |    | 8 | 2  |   |    |    |    |
| <b>PKHL1</b> | Fibrocystin-L precursor - Homo sapiens (Human)                                      |    | 1 |    |   |    |    |    |
| <b>PKHN1</b> | Pleckstrin homology domain-containing family N member 1 - Homo sapiens (Human)      |    |   |    |   |    |    |    |
| <b>PKP1</b>  | Plakophilin-1 - Homo sapiens (Human)                                                |    |   |    |   |    |    | 12 |
| <b>PKP3</b>  | Plakophilin-3 - Homo sapiens (Human)                                                |    |   | 2  |   |    |    |    |
| <b>PKP4</b>  | Plakophilin-4 - Homo sapiens (Human)                                                | 13 | 5 | 4  | 2 | 14 | 2  | 24 |
| <b>PLAK</b>  | Junction plakoglobin - Homo sapiens (Human)                                         |    |   | 2  |   |    |    |    |

|              |                                                                                     |    |   |    |    |    |    |    |
|--------------|-------------------------------------------------------------------------------------|----|---|----|----|----|----|----|
| <b>PLCG1</b> | (Human)                                                                             | 17 | 2 | 4  | 12 | 5  | 11 | 5  |
| <b>PLD3</b>  | Phospholipase D3 - Homo sapiens (Human)                                             |    |   |    |    |    | 1  |    |
| <b>PLEC1</b> | Plectin-1 - Homo sapiens (Human)                                                    |    |   | 8  | 6  | 4  | 12 |    |
| <b>PLK3</b>  | Serine/threonine-protein kinase PLK3 - Homo sapiens (Human)                         |    |   | 1  |    |    |    |    |
| <b>PLL</b>   | Plasmalogen - Homo sapiens (Human)                                                  |    |   |    |    |    |    | 1  |
| <b>PP1RB</b> | Protein phosphatase 1 regulatory subunit 11 - Homo sapiens (Human)                  |    |   |    | 1  | 1  |    | 1  |
| <b>PPCE</b>  | Prolyl endopeptidase - Homo sapiens (Human)                                         |    | 2 |    |    |    |    |    |
| <b>PPHLN</b> | Periplin-1 - Homo sapiens (Human)                                                   |    |   | 5  |    |    |    | 2  |
| <b>PRC1</b>  | Protein regulator of cytokinesis 1 - Homo sapiens (Human)                           |    |   |    |    |    |    |    |
| <b>PRDX1</b> | Peroxiredoxin-1 - Homo sapiens (Human)                                              |    |   |    |    |    |    | 1  |
| <b>PRKDC</b> | DNA-dependent protein kinase catalytic subunit - Homo sapiens (Human)               |    |   |    | 7  |    |    |    |
| <b>PRLR</b>  | Prolactin receptor precursor - Homo sapiens (Human)                                 | 1  |   |    |    |    |    |    |
| <b>PROF1</b> | Profilin-1 - Homo sapiens (Human)                                                   | 1  |   |    |    |    | 2  |    |
| <b>PRP4B</b> | Serine/threonine-protein kinase PRP4 homolog - Homo sapiens (Human)                 | 15 | 4 | 4  | 6  | 10 | 8  | 8  |
| <b>PRS10</b> | 26S protease regulatory subunit S10B - Homo sapiens (Human)                         |    |   | 9  |    |    |    |    |
| <b>PRS7</b>  | 26S protease regulatory subunit 7 - Homo sapiens (Human)                            |    |   |    |    |    |    |    |
| <b>PSA2</b>  | Proteasome subunit alpha type-2 - Homo sapiens (Human)                              |    |   | 2  | 4  | 5  |    |    |
| <b>PSB8</b>  | Proteasome subunit beta type-8 precursor - Homo sapiens (Human)                     |    |   |    |    |    | 1  |    |
| <b>PSD3</b>  | PH and SEC7 domain-containing protein 3 - Homo sapiens (Human)                      |    |   |    |    |    |    |    |
| <b>PSMD1</b> | 26S proteasome non-ATPase regulatory subunit 1 - Homo sapiens (Human)               | 1  |   |    |    |    |    |    |
| <b>PTN11</b> | Tyrosine-protein phosphatase non-receptor type 11 - Homo sapiens (Human)            | 11 | 6 | 4  | 8  | 5  | 7  | 9  |
| <b>PTN13</b> | Tyrosine-protein phosphatase non-receptor type 13 - Homo sapiens (Human)            |    |   |    |    |    |    | 2  |
| <b>PTN14</b> | Tyrosine-protein phosphatase non-receptor type 14 - Homo sapiens (Human)            |    |   |    |    | 4  |    | 2  |
| <b>PTN18</b> | Tyrosine-protein phosphatase non-receptor type 18 - Homo sapiens (Human)            |    |   |    | 1  | 1  | 1  |    |
| <b>PTN3</b>  | Tyrosine-protein phosphatase non-receptor type 3 - Homo sapiens (Human)             |    |   |    |    |    |    |    |
| <b>PTPRA</b> | Receptor-type tyrosine-protein phosphatase alpha precursor - Homo sapiens (Human)   | 6  | 5 |    | 4  | 7  | 4  | 5  |
| <b>PTPRE</b> | Receptor-type tyrosine-protein phosphatase epsilon precursor - Homo sapiens (Human) |    |   |    | 2  | 3  |    |    |
| <b>PTRF</b>  | Polymerase I and transcript release factor - Homo sapiens (Human)                   | 6  | 6 | 5  | 12 | 13 | 15 | 2  |
| <b>PTTG</b>  | (Human)                                                                             | 8  | 9 | 11 | 4  | 12 | 11 | 10 |
| <b>PURG</b>  | Purine-rich element-binding protein gamma - Homo sapiens (Human)                    |    |   | 1  |    |    |    |    |
| <b>PVRL3</b> | Poliiovirus receptor-related protein 3 precursor - Homo sapiens (Human)             |    | 3 |    |    | 3  | 1  |    |
| <b>PYGB</b>  | Glycogen phosphorylase, brain form - Homo sapiens (Human)                           | 3  |   | 3  |    |    |    |    |
| <b>RAB34</b> | Ras-related protein Rab-34 - Homo sapiens (Human)                                   |    | 2 |    |    |    |    | 4  |
| <b>RAB7A</b> | Ras-related protein Rab-7a - Homo sapiens (Human)                                   |    | 1 |    |    |    |    |    |
| <b>RAB9A</b> | Ras-related protein Rab-9A - Homo sapiens (Human)                                   |    |   |    |    |    |    |    |
| <b>RABL3</b> | Rab-like protein 3 - Homo sapiens (Human)                                           |    |   |    |    |    |    |    |
| <b>RADI</b>  | Radixin - Homo sapiens (Human)                                                      |    |   |    |    |    |    |    |



|              |                                                                                      |   |   |  |    |   |   |   |    |
|--------------|--------------------------------------------------------------------------------------|---|---|--|----|---|---|---|----|
| <b>RAI1</b>  | Retinoic acid-induced protein 1 - Homo sapiens (Human)                               |   |   |  | 4  |   |   |   |    |
| <b>RAI3</b>  | Retinoic acid-induced protein 3 - Homo sapiens (Human)                               |   |   |  |    | 2 |   |   | 1  |
| <b>RAN</b>   | GTP-binding nuclear protein Ran - Homo sapiens (Human)                               | 1 | 2 |  | 5  | 2 |   |   | 8  |
| <b>RAPH1</b> | (Human)                                                                              |   |   |  | 2  | 4 | 5 |   | 6  |
| <b>RBBP6</b> | Retinoblastoma-binding protein 6 - Homo sapiens (Human)                              |   |   |  |    |   |   |   | 1  |
| <b>RBL2</b>  | Retinoblastoma-like protein 2 - Homo sapiens (Human)                                 |   |   |  |    | 1 |   |   |    |
| <b>RBM14</b> | RNA-binding protein 14 - Homo sapiens (Human)                                        |   |   |  | 32 | 3 | 1 |   | 2  |
| <b>RBM15</b> | Putative RNA-binding protein 15 - Homo sapiens (Human)                               |   |   |  | 5  |   |   |   | 1  |
| <b>RBM22</b> | Pre-mRNA-splicing factor RBM22 - Homo sapiens (Human)                                |   |   |  | 1  |   |   |   |    |
| <b>RBM3</b>  | Putative RNA-binding protein 3 - Homo sapiens (Human)                                | 3 | 3 |  | 9  | 9 | 6 |   | 7  |
| <b>RBM4</b>  | RNA-binding protein 4 - Homo sapiens (Human)                                         |   |   |  | 4  |   |   |   | 6  |
| <b>RBP17</b> | Ran-binding protein 17 - Homo sapiens (Human)                                        |   |   |  |    |   |   |   | 1  |
| <b>RENT1</b> | Regulator of nonsense transcripts 1 - Homo sapiens (Human)                           |   |   |  |    |   |   |   |    |
| <b>REPS2</b> | RaBP1-associated Eps domain-containing protein 2 - Homo sapiens (Human)              |   |   |  |    | 1 |   |   |    |
| <b>RET</b>   | Proto-oncogene tyrosine-protein kinase receptor ret precursor - Homo sapiens (Human) |   |   |  |    |   |   |   | 11 |
| <b>RFA1</b>  | Replication protein A 70 kDa DNA-binding subunit - Homo sapiens (Human)              |   |   |  |    |   | 1 |   |    |
| <b>RFFL</b>  | E3 ubiquitin-protein ligase rifylin - Homo sapiens (Human)                           | 5 |   |  |    |   |   |   |    |
| <b>RG9D1</b> | RNA - Homo sapiens (Human)                                                           |   |   |  |    |   | 1 |   |    |
| <b>RGS22</b> | Regulator of G-protein signaling 22 - Homo sapiens (Human)                           |   |   |  |    |   | 1 |   |    |
| <b>RHG05</b> | Rho GTPase-activating protein 5 - Homo sapiens (Human)                               | 2 |   |  |    |   |   | 2 |    |
| <b>RHG12</b> | Rho GTPase-activating protein 12 - Homo sapiens (Human)                              | 2 | 3 |  |    |   | 4 | 4 |    |
| <b>RIN1</b>  | Ras and Rab interactor 1 - Homo sapiens (Human)                                      | 4 | 4 |  | 3  | 5 | 4 | 5 | 2  |
| <b>RIPK2</b> | Receptor-interacting serine/threonine-protein kinase 2 - Homo sapiens (Human)        | 2 | 1 |  | 4  | 1 | 2 | 2 | 2  |
| <b>RL27A</b> | 60S ribosomal protein L27a - Homo sapiens (Human)                                    |   |   |  | 2  |   |   |   |    |
| <b>RL29</b>  | 60S ribosomal protein L29 - Homo sapiens (Human)                                     |   |   |  |    |   | 2 |   | 1  |
| <b>RL3</b>   | 60S ribosomal protein L3 - Homo sapiens (Human)                                      |   |   |  |    |   | 1 |   |    |
| <b>RL38</b>  | 60S ribosomal protein L38 - Homo sapiens (Human)                                     | 4 |   |  |    |   |   |   |    |
| <b>RL7A</b>  | 60S ribosomal protein L7a - Homo sapiens (Human)                                     | 2 |   |  | 1  |   |   |   |    |
| <b>RLA0</b>  | 60S acidic ribosomal protein P0 - Homo sapiens (Human)                               | 4 | 1 |  |    |   |   |   |    |
| <b>RM14</b>  | 39S ribosomal protein L14, mitochondrial precursor - Homo sapiens (Human)            | 2 |   |  |    |   |   |   |    |
| <b>RM17</b>  | 39S ribosomal protein L17, mitochondrial precursor - Homo sapiens (Human)            |   |   |  |    |   |   |   |    |
| <b>RNUXA</b> | RNA U small nuclear RNA export adapter protein - Homo sapiens (Human)                |   |   |  | 3  |   |   |   |    |
| <b>ROA0</b>  | Heterogeneous nuclear ribonucleoprotein A0 - Homo sapiens (Human)                    |   |   |  |    |   |   |   | 2  |
| <b>ROA1</b>  | Heterogeneous nuclear ribonucleoprotein A1 - Homo sapiens (Human)                    | 5 | 3 |  | 6  | 6 | 3 | 4 | 6  |
| <b>ROA2</b>  | Heterogeneous nuclear ribonucleoproteins A2/B1 - Homo sapiens (Human)                | 1 |   |  | 6  | 4 | 2 | 1 | 2  |
| <b>ROA3</b>  | Heterogeneous nuclear ribonucleoprotein A3 - Homo sapiens (Human)                    |   |   |  | 1  |   |   |   |    |
| <b>ROBO1</b> | Roundabout homolog 1 precursor - Homo sapiens (Human)                                | 3 | 3 |  |    |   | 4 |   | 4  |



|              |                                                                                   |    |    |    |    |    |    |    |
|--------------|-----------------------------------------------------------------------------------|----|----|----|----|----|----|----|
| <b>SEPT9</b> | Septin-9 - Homo sapiens (Human)                                                   | 2  |    | 5  |    | 2  |    |    |
| <b>SF3B2</b> | Splicing factor 3B subunit 2 - Homo sapiens (Human)                               |    |    |    |    |    |    |    |
| <b>SFPQ</b>  | Splicing factor, proline- and glutamine-rich - Homo sapiens (Human)               |    |    | 3  |    |    |    |    |
| <b>SFRS1</b> | Splicing factor, arginine/serine-rich 1 - Homo sapiens (Human)                    |    |    |    |    |    | 1  |    |
| <b>SFRS3</b> | Splicing factor, arginine/serine-rich 3 - Homo sapiens (Human)                    |    | 4  | 2  |    | 1  | 2  | 1  |
| <b>SFRS7</b> | Splicing factor, arginine/serine-rich 7 - Homo sapiens (Human)                    |    | 2  |    |    |    |    |    |
| <b>SG223</b> | Tyrosine-protein kinase Sgk223 - Homo sapiens (Human)                             | 3  | 6  | 1  | 4  | 1  |    |    |
| <b>SG269</b> | Tyrosine-protein kinase Sgk269 - Homo sapiens (Human)                             | 21 | 18 | 4  | 17 | 21 | 15 | 16 |
| <b>SH22A</b> | SH2 domain-containing protein 2A - Homo sapiens (Human)                           |    |    |    |    |    |    |    |
| <b>SH24A</b> | SH2 domain-containing protein 4A - Homo sapiens (Human)                           | 1  |    |    |    |    |    |    |
| <b>SHAN1</b> | SH3 and multiple ankyrin repeat domains protein 1 - Homo sapiens (Human)          |    | 1  |    |    |    |    |    |
| <b>SHB</b>   | SH2 domain-containing adapter protein B - Homo sapiens (Human)                    | 2  | 18 | 15 | 6  | 24 | 18 | 21 |
| <b>SHC1</b>  | SHC-transforming protein 1 - Homo sapiens (Human)                                 | 4  | 4  | 3  | 4  | 4  | 1  | 4  |
| <b>SHC2</b>  | SHC-transforming protein 2 - Homo sapiens (Human)                                 |    |    |    |    |    |    |    |
| <b>SHIP2</b> | Phosphatidylinositol-3,4,5-trisphosphate 5-phosphatase 2 - Homo sapiens (Human)   | 7  | 9  | 6  | 11 | 12 | 7  | 6  |
| <b>SHLB1</b> | Endophilin-B1 - Homo sapiens (Human)                                              |    |    |    |    | 2  |    |    |
| <b>SHPS1</b> | (Human)                                                                           |    |    |    |    | 2  | 1  | 5  |
| <b>SIX3</b>  | Homeobox protein SIX3 - Homo sapiens (Human)                                      |    |    | 1  |    |    |    |    |
| <b>SKT</b>   | Sickle tail protein homolog - Homo sapiens (Human)                                |    |    | 9  | 1  | 7  | 1  | 9  |
| <b>SL9A1</b> | Sodium/hydrogen exchanger 1 - Homo sapiens (Human)                                | 2  | 2  |    |    | 4  |    |    |
| <b>SLN11</b> | Schlafen family member 11 - Homo sapiens (Human)                                  |    |    |    |    |    |    | 1  |
| <b>SMAP</b>  | Small acidic protein - Homo sapiens (Human)                                       |    |    |    |    |    |    |    |
| <b>SMC3</b>  | Structural maintenance of chromosomes protein 3 - Homo sapiens (Human)            |    | 1  | 3  |    |    |    |    |
| <b>SMCE1</b> | member 1 - Homo sapiens (Human)                                                   |    |    | 4  |    |    |    |    |
| <b>SMRD1</b> | member 1 - Homo sapiens (Human)                                                   |    |    | 1  |    |    |    |    |
| <b>SNP23</b> | Synaptosomal-associated protein 23 - Homo sapiens (Human)                         |    |    |    |    |    |    | 4  |
| <b>SNW1</b>  | SNW domain-containing protein 1 - Homo sapiens (Human)                            |    |    |    | 12 |    |    |    |
| <b>SNX5</b>  | Sorting nexin-5 - Homo sapiens (Human)                                            |    |    |    | 1  |    |    |    |
| <b>SO1B1</b> | Solute carrier organic anion transporter family member 1B1 - Homo sapiens (Human) |    |    |    |    |    |    | 2  |
| <b>SO3A1</b> | Solute carrier organic anion transporter family member 3A1 - Homo sapiens (Human) | 1  |    |    |    |    |    |    |
| <b>SOCS6</b> | Suppressor of cytokine signaling 6 - Homo sapiens (Human)                         | 2  |    |    |    |    |    |    |
| <b>SON</b>   | SON protein - Homo sapiens (Human)                                                |    |    | 3  |    |    | 2  |    |
| <b>SPF30</b> | Survival of motor neuron-related-splicing factor 30 - Homo sapiens (Human)        |    |    |    |    |    |    |    |
| <b>SPHK2</b> | Sphingosine kinase 2 - Homo sapiens (Human)                                       |    |    |    |    |    |    |    |
| <b>SPN1</b>  | Snurportin-1 - Homo sapiens (Human)                                               |    |    |    |    |    |    |    |
| <b>SPTB2</b> | Spectrin beta chain, brain 1 - Homo sapiens (Human)                               |    | 2  | 2  | 2  | 1  | 2  |    |
| <b>SPTC1</b> | Serine palmitoyltransferase 1 - Homo sapiens (Human)                              |    |    |    |    |    |    | 2  |

|              |                                                                                     |   |   |   |    |    |    |   |    |
|--------------|-------------------------------------------------------------------------------------|---|---|---|----|----|----|---|----|
| <b>SPY1</b>  | Protein sprouty homolog 1 - Homo sapiens (Human)                                    |   |   | 3 |    |    |    |   | 2  |
| <b>SPY2</b>  | Protein sprouty homolog 2 - Homo sapiens (Human)                                    |   |   |   | 1  |    |    |   | 1  |
| <b>SQRD</b>  | Sulfide:quinone oxidoreductase, mitochondrial precursor - Homo sapiens (Human)      |   |   |   |    |    |    | 1 |    |
| <b>SRC8</b>  | Src substrate cortactin - Homo sapiens (Human)                                      | 9 | 8 | 7 | 10 | 14 | 11 |   | 13 |
| <b>SREC2</b> | Scavenger receptor class F member 2 precursor - Homo sapiens (Human)                | 4 | 4 | 1 | 4  | 3  |    |   |    |
| <b>SRRM2</b> | Serine/arginine repetitive matrix protein 2 - Homo sapiens (Human)                  |   |   |   | 2  | 1  |    |   |    |
| <b>SSB</b>   | Single-stranded DNA-binding protein, mitochondrial precursor - Homo sapiens (Human) |   |   |   |    |    |    |   |    |
| <b>STA5A</b> | Signal transducer and activator of transcription 5A - Homo sapiens (Human)          |   |   |   | 3  | 1  |    |   |    |
| <b>STAC3</b> | SH3 and cysteine-rich domain-containing protein 3 - Homo sapiens (Human)            |   |   | 1 |    |    |    |   |    |
| <b>STAM2</b> | Signal transducing adapter molecule 2 - Homo sapiens (Human)                        | 1 | 2 |   | 2  | 3  | 6  |   | 2  |
| <b>STAT3</b> | Signal transducer and activator of transcription 3 - Homo sapiens (Human)           | 3 | 4 | 4 | 4  | 8  | 4  |   | 6  |
| <b>STIP1</b> | Stress-induced-phosphoprotein 1 - Homo sapiens (Human)                              |   |   |   | 2  | 3  | 1  |   | 1  |
| <b>STX5</b>  | Syntaxin-5 - Homo sapiens (Human)                                                   |   |   |   |    |    |    |   |    |
| <b>SUH</b>   | Recombining binding protein suppressor of hairless - Homo sapiens (Human)           |   |   |   |    |    |    |   |    |
| <b>SUSD5</b> | Sushi domain-containing protein 5 - Homo sapiens (Human)                            | 1 |   |   |    |    |    |   |    |
| <b>SYIC</b>  | Isoleucyl-tRNA synthetase, cytoplasmic - Homo sapiens (Human)                       | 1 |   |   |    |    |    | 1 |    |
| <b>SYNE1</b> | Nesprin-1 - Homo sapiens (Human)                                                    |   |   |   |    | 1  |    |   |    |
| <b>SYNE2</b> | Nesprin-2 - Homo sapiens (Human)                                                    |   |   |   |    | 2  |    |   |    |
| <b>SYNJ1</b> | Synaptojanin-1 - Homo sapiens (Human)                                               |   |   |   |    |    | 2  |   |    |
| <b>SYNJ2</b> | Synaptojanin-2 - Homo sapiens (Human)                                               |   |   |   |    | 11 |    |   |    |
| <b>SYV</b>   | Valyl-tRNA synthetase - Homo sapiens (Human)                                        |   |   |   | 2  | 1  |    |   |    |
| <b>T106B</b> | Transmembrane protein 106B - Homo sapiens (Human)                                   | 4 | 1 |   |    |    | 2  |   | 3  |
| <b>T200A</b> | Transmembrane protein 200A - Homo sapiens (Human)                                   |   |   |   |    |    |    |   |    |
| <b>T2FB</b>  | Transcription initiation factor IIF subunit beta - Homo sapiens (Human)             |   |   |   |    | 5  |    |   |    |
| <b>TAF4B</b> | Transcription initiation factor TFIID subunit 4B - Homo sapiens (Human)             |   |   |   |    | 1  |    |   |    |
| <b>TAGL</b>  | Transgelin - Homo sapiens (Human)                                                   |   |   |   |    |    | 2  | 4 |    |
| <b>TAGL2</b> | Transgelin-2 - Homo sapiens (Human)                                                 | 2 | 5 | 2 | 14 | 11 | 13 |   | 7  |
| <b>TARA</b>  | TRIO and F-actin-binding protein - Homo sapiens (Human)                             | 4 |   |   |    |    |    |   |    |
| <b>TBA1A</b> | Tubulin alpha-1A chain - Homo sapiens (Human)                                       | 6 | 9 |   | 7  | 7  | 7  |   | 2  |
| <b>TBA1B</b> | Tubulin alpha-1B chain - Homo sapiens (Human)                                       | 3 | 5 |   |    | 3  | 1  |   | 1  |
| <b>TBB5</b>  | Tubulin beta chain - Homo sapiens (Human)                                           |   |   |   |    |    |    |   |    |
| <b>TBB6</b>  | Tubulin beta-6 chain - Homo sapiens (Human)                                         |   |   |   |    |    |    |   |    |
| <b>TBCB</b>  | Tubulin folding cofactor B - Homo sapiens (Human)                                   | 2 |   |   |    | 4  |    |   | 2  |
| <b>TCF20</b> | Transcription factor 20 - Homo sapiens (Human)                                      |   |   |   |    | 5  |    |   |    |
| <b>TCPB</b>  | T-complex protein 1 subunit beta - Homo sapiens (Human)                             |   |   |   |    |    | 1  |   |    |
| <b>TCPQ</b>  | T-complex protein 1 subunit theta - Homo sapiens (Human)                            |   |   |   |    | 4  |    |   |    |
| <b>TDRD3</b> | Tudor domain-containing protein 3 - Homo sapiens (Human)                            |   |   |   |    | 2  |    |   |    |



|              |                                                                                |   |   |   |    |    |   |   |
|--------------|--------------------------------------------------------------------------------|---|---|---|----|----|---|---|
| <b>TRIP6</b> | Thyroid receptor-interacting protein 6 - Homo sapiens (Human)                  | 4 |   |   | 2  |    | 5 |   |
| <b>TRIPC</b> | Probable E3 ubiquitin-protein ligase TRIP12 - Homo sapiens (Human)             |   |   |   |    |    |   |   |
| <b>TRPV4</b> | (Human)                                                                        | 2 |   |   |    |    |   |   |
| <b>TRXR1</b> | Thioredoxin reductase 1, cytoplasmic precursor - Homo sapiens (Human)          | 2 |   |   |    |    |   |   |
| <b>TTDN1</b> | TTD non-photosensitive 1 protein - Homo sapiens (Human)                        |   |   |   | 2  |    |   |   |
| <b>TTYH2</b> | Protein tweety homolog 2 - Homo sapiens (Human)                                | 3 | 5 |   |    |    |   |   |
| <b>TWF2</b>  | Twinfilin-2 - Homo sapiens (Human)                                             |   |   |   |    |    |   |   |
| <b>TYK2</b>  | Non-receptor tyrosine-protein kinase TYK2 - Homo sapiens (Human)               | 4 | 4 | 2 | 3  | 5  | 2 | 3 |
| <b>UBAP2</b> | Ubiquitin-associated protein 2 - Homo sapiens (Human)                          | 2 |   | 8 |    |    |   | 2 |
| <b>UBP10</b> | Ubiquitin carboxyl-terminal hydrolase 10 - Homo sapiens (Human)                |   |   | 2 |    |    |   |   |
| <b>UBP15</b> | Ubiquitin carboxyl-terminal hydrolase 15 - Homo sapiens (Human)                |   |   |   |    |    |   |   |
| <b>UBP18</b> | Ubl carboxyl-terminal hydrolase 18 - Homo sapiens (Human)                      |   | 2 |   |    |    |   |   |
| <b>UBP19</b> | Ubiquitin carboxyl-terminal hydrolase 19 - Homo sapiens (Human)                |   |   |   |    |    |   |   |
| <b>UBP24</b> | Ubiquitin carboxyl-terminal hydrolase 24 - Homo sapiens (Human)                |   |   |   |    |    |   | 1 |
| <b>UBP2L</b> | Ubiquitin-associated protein 2-like - Homo sapiens (Human)                     |   |   | 8 |    | 3  |   | 1 |
| <b>UBR5</b>  | E3 ubiquitin-protein ligase UBR5 - Homo sapiens (Human)                        |   | 1 |   |    |    |   |   |
| <b>UBXD8</b> | UBX domain-containing protein 8 - Homo sapiens (Human)                         |   |   |   |    |    | 1 |   |
| <b>UCK2</b>  | Uridine-cytidine kinase 2 - Homo sapiens (Human)                               |   |   |   |    |    |   |   |
| <b>UFC1</b>  | Ufm1-conjugating enzyme 1 - Homo sapiens (Human)                               |   |   |   | 1  |    |   |   |
| <b>UK114</b> | Ribonuclease UK114 - Homo sapiens (Human)                                      |   |   |   |    |    |   |   |
| <b>UNC5C</b> | Netrin receptor UNC5C precursor - Homo sapiens (Human)                         | 3 |   |   |    |    |   |   |
| <b>UNG</b>   | Uracil-DNA glycosylase - Homo sapiens (Human)                                  |   |   |   |    |    |   |   |
| <b>URP2</b>  | Fermitin family homolog 3 - Homo sapiens (Human)                               |   |   |   |    |    |   | 2 |
| <b>US6NL</b> | USP6 N-terminal-like protein - Homo sapiens (Human)                            | 3 |   |   |    |    |   | 1 |
| <b>VASP</b>  | Vasodilator-stimulated phosphoprotein - Homo sapiens (Human)                   | 4 | 6 | 6 | 5  | 6  | 5 | 3 |
| <b>VGFR1</b> | Vascular endothelial growth factor receptor 1 precursor - Homo sapiens (Human) |   | 6 |   |    |    |   | 4 |
| <b>VIME</b>  | Vimentin - Homo sapiens (Human)                                                | 5 | 8 | 5 | 1  | 8  | 8 | 6 |
| <b>VINC</b>  | Vinculin - Homo sapiens (Human)                                                | 4 | 8 | 1 | 10 | 11 | 3 | 8 |
| <b>VP37A</b> | Vacuolar protein sorting-associated protein 37A - Homo sapiens (Human)         |   |   |   |    |    |   |   |
| <b>VTI1B</b> | (Human)                                                                        |   | 5 |   | 1  | 7  |   |   |
| <b>VWF</b>   | von Willebrand factor precursor - Homo sapiens (Human)                         |   |   |   |    | 1  |   |   |
| <b>WASL</b>  | Neural Wiskott-Aldrich syndrome protein - Homo sapiens (Human)                 | 2 | 3 | 2 | 5  | 1  | 5 | 2 |
| <b>WBS22</b> | Uncharacterized methyltransferase WBSCR22 - Homo sapiens (Human)               |   |   |   |    |    |   | 1 |
| <b>WDR1</b>  | WD repeat-containing protein 1 - Homo sapiens (Human)                          |   |   | 4 |    | 4  |   |   |
| <b>WDR70</b> | WD repeat-containing protein 70 - Homo sapiens (Human)                         |   |   | 4 |    |    |   |   |
| <b>WDTC1</b> | WD and tetratricopeptide repeats protein 1 - Homo sapiens (Human)              |   |   |   | 1  |    |   |   |
| <b>WEE1</b>  | Wee1-like protein kinase - Homo sapiens (Human)                                |   | 2 |   |    |    |   | 2 |

|              |                                                                            |   |   |    |   |   |   |   |
|--------------|----------------------------------------------------------------------------|---|---|----|---|---|---|---|
| <b>WIPF2</b> | WAS/WASL-interacting protein family member 2 - Homo sapiens (Human)        |   |   |    |   | 9 |   |   |
| <b>XCT</b>   | Cystine/glutamate transporter - Homo sapiens (Human)                       | 1 |   |    | 4 | 4 | 4 | 3 |
| <b>XRN2</b>  | 5'-3' exoribonuclease 2 - Homo sapiens (Human)                             |   | 1 |    |   | 1 |   |   |
| <b>YBOX1</b> | Nuclease sensitive element-binding protein 1 - Homo sapiens (Human)        |   |   | 2  | 4 | 5 |   | 2 |
| <b>YIPF5</b> | Protein YIPF5 - Homo sapiens (Human)                                       |   |   |    |   |   | 2 |   |
| <b>YLPM1</b> | YLP motif-containing protein 1 - Homo sapiens (Human)                      |   |   | 13 |   |   |   |   |
| <b>Z804B</b> | Zinc finger protein 804B - Homo sapiens (Human)                            |   |   |    |   |   |   |   |
| <b>ZCC2</b>  | Zinc finger CCCH type antiviral protein 1 - Homo sapiens (Human)           | 4 | 2 |    |   | 3 |   |   |
| <b>ZCH18</b> | Zinc finger CCCH domain-containing protein 18 - Homo sapiens (Human)       |   |   |    |   |   |   | 3 |
| <b>ZCHC6</b> | Zinc finger CCHC domain-containing protein 6 - Homo sapiens (Human)        | 1 | 1 |    |   | 1 | 2 | 1 |
| <b>ZDBF2</b> | DBF4-type zinc finger-containing protein 2 - Homo sapiens (Human)          |   |   |    | 1 |   |   |   |
| <b>ZDH18</b> | Palmitoyltransferase ZDHHC18 - Homo sapiens (Human)                        | 2 |   |    |   |   |   |   |
| <b>ZDHC5</b> | Probable palmitoyltransferase ZDHHC5 - Homo sapiens (Human)                | 4 |   | 1  | 1 | 1 | 4 | 2 |
| <b>ZDHC8</b> | Probable palmitoyltransferase ZDHHC8 - Homo sapiens (Human)                |   |   |    | 2 |   |   |   |
| <b>ZER1</b>  | Protein zer-1 homolog - Homo sapiens (Human)                               |   |   |    |   |   |   | 1 |
| <b>ZN281</b> | Zinc finger protein 281 - Homo sapiens (Human)                             |   |   | 1  |   |   |   |   |
| <b>ZN382</b> | Zinc finger protein 382 - Homo sapiens (Human)                             |   |   | 1  |   |   |   |   |
| <b>ZN433</b> | Zinc finger protein 433 - Homo sapiens (Human)                             |   |   |    |   |   |   |   |
| <b>ZN483</b> | Zinc finger protein 483 - Homo sapiens (Human)                             |   | 1 |    |   |   |   |   |
| <b>ZN492</b> | Zinc finger protein 492 - Homo sapiens (Human)                             |   |   |    |   |   |   |   |
| <b>ZN598</b> | Zinc finger protein 598 - Homo sapiens (Human)                             |   |   | 4  |   |   |   |   |
| <b>ZN600</b> | Zinc finger protein 600 - Homo sapiens (Human)                             |   |   |    |   | 1 |   |   |
| <b>ZN609</b> | Zinc finger protein 609 - Homo sapiens (Human)                             |   |   |    |   |   |   |   |
| <b>ZN638</b> | Zinc finger protein 638 - Homo sapiens (Human)                             |   |   | 3  |   |   |   |   |
| <b>ZN644</b> | Zinc finger protein 644 - Homo sapiens (Human)                             |   |   | 3  |   |   |   |   |
| <b>ZN668</b> | Zinc finger protein 668 - Homo sapiens (Human)                             |   |   |    |   | 1 |   |   |
| <b>ZN709</b> | Zinc finger protein 709 - Homo sapiens (Human)                             |   |   |    |   |   |   |   |
| <b>ZN787</b> | Zinc finger protein 787 - Homo sapiens (Human)                             |   |   | 1  |   |   |   |   |
| <b>ZN821</b> | Zinc finger protein 821 - Homo sapiens (Human)                             |   |   |    |   |   |   | 1 |
| <b>ZNF84</b> | Zinc finger protein 84 - Homo sapiens (Human)                              |   |   |    |   |   |   | 1 |
| <b>ZNFX1</b> | NFX1-type zinc finger-containing protein 1 - Homo sapiens (Human)          |   |   |    |   |   |   | 1 |
| <b>ZO1</b>   | Tight junction protein ZO-1 - Homo sapiens (Human)                         |   |   | 3  | 4 | 8 |   |   |
| <b>ZO2</b>   | Tight junction protein ZO-2 - Homo sapiens (Human)                         | 4 | 5 | 6  | 9 | 9 | 5 | 4 |
| <b>ZRAB3</b> | Zinc finger Ran-binding domain-containing protein 3 - Homo sapiens (Human) |   |   |    |   | 1 |   |   |
| <b>ZYX</b>   | Zyxin - Homo sapiens (Human)                                               | 2 |   | 1  | 3 | 2 | 2 | 1 |

---

**RD-ES SK-LMS1 HT1080**

---

|   |    |    |
|---|----|----|
| 1 | 2  | 5  |
|   | 3  | 6  |
|   |    | 1  |
| 6 | 10 | 10 |
|   | 1  | 1  |
| 2 | 3  | 8  |
|   |    | 2  |
| 3 | 6  | 13 |
|   |    | 6  |
|   |    | 1  |
|   |    | 1  |
|   |    | 4  |
|   |    | 4  |
|   | 5  | 8  |
|   | 2  |    |
| 1 |    |    |
|   | 10 | 13 |
|   |    | 4  |



|   |    |    |
|---|----|----|
| 6 | 9  | 1  |
|   | 3  |    |
|   | 17 | 10 |
| 1 | 1  | 4  |
|   |    | 1  |
|   | 4  | 1  |
|   | 3  | 4  |
|   | 1  | 2  |
|   | 1  |    |
|   |    | 1  |
| 2 | 4  | 1  |
|   |    | 7  |
|   |    | 1  |
| 3 | 13 | 19 |
| 5 | 10 | 16 |
|   |    | 3  |

|    |    |    |
|----|----|----|
| 1  | 2  |    |
|    |    | 1  |
|    |    | 3  |
|    |    | 3  |
| 3  | 7  | 7  |
|    |    | 3  |
|    |    | 1  |
| 4  | 1  |    |
|    | 10 | 4  |
|    | 1  | 1  |
| 6  | 1  | 2  |
|    |    | 1  |
|    | 4  | 6  |
| 23 | 40 | 69 |
|    | 5  | 28 |
| 4  | 19 | 21 |
|    | 1  | 3  |
| 4  |    |    |

1 3 15

4  
3

1

1  
1  
2  
4

7  
3

3 4  
8 8  
1

2 6 11

1  
1 2  
2

|   |   |   |
|---|---|---|
|   | 2 | 6 |
| 1 |   | 3 |
|   | 3 | 1 |

1

|   |    |    |
|---|----|----|
|   | 2  |    |
| 4 | 17 | 29 |

1

|  |    |    |
|--|----|----|
|  | 3  | 4  |
|  | 7  | 8  |
|  | 23 | 33 |

|   |   |   |
|---|---|---|
| 2 | 2 | 2 |
|---|---|---|

3

|   |  |   |
|---|--|---|
|   |  | 2 |
| 1 |  | 1 |

1  
1

5

6      6  
2      2  
2  
8      34

2

4

19      1  
3      5      5  
1      3      1

4      1      5

5      6      8  
1

9      1  
5

4      15      12

1  
2

4

4

3

4 1 2  
1

5 9 17  
4 3 4  
6 3

2 2 2  
6

2 1  
4 3

2 3 3  
1

2 4 4

2

2

1 9 11

1

|    |    |    |
|----|----|----|
|    | 1  | 1  |
|    | 2  | 4  |
| 3  | 2  |    |
|    | 14 | 1  |
|    |    | 1  |
|    | 9  |    |
|    |    | 1  |
| 4  | 4  | 2  |
|    |    | 5  |
| 14 | 10 | 2  |
|    | 1  | 13 |
|    | 14 | 7  |
|    |    | 16 |
|    |    | 2  |
|    | 1  |    |
|    | 1  |    |
|    |    | 4  |
|    |    | 2  |
|    | 2  |    |
|    | 3  | 4  |
|    | 3  |    |
|    | 1  |    |

2

9 5 10

32 17 1  
45

3 1 1  
1 4

1 2

10 6 5  
5 7 4  
3 3 4  
4  
2

1  
2  
1

1  
1  
4

3 1 3  
6 8

2



2

2

1

1

4

2

1

2

6

1

1

1

2

4

4

1

6

23

4

3

4

1

6

4

9

8

3

4

4

2

2

1

|    |    |    |
|----|----|----|
|    | 1  |    |
| 43 | 20 | 12 |
| 1  |    |    |
|    | 8  | 20 |
|    | 2  | 4  |
|    |    | 1  |
| 3  | 15 | 14 |
|    | 6  |    |
|    |    | 2  |
|    | 3  | 1  |
|    | 1  | 3  |
|    |    | 4  |
|    | 6  | 1  |
|    | 3  | 3  |
|    |    |    |
|    | 2  |    |
|    |    | 4  |

1

3

5

1

1

7

15

1

5

3  
22

17

11

5

2

6

3

7

3

2

3

1

|    |   |    |
|----|---|----|
|    | 3 |    |
| 2  | 2 | 2  |
| 18 | 5 | 12 |
| 1  | 1 | 2  |
|    | 3 | 2  |
| 5  | 7 | 9  |
|    |   | 1  |
| 1  | 1 |    |
|    |   |    |
|    |   | 1  |
|    | 3 |    |
|    |   |    |
|    | 4 | 5  |
|    | 5 | 4  |
|    |   | 2  |
|    |   |    |
|    |   | 5  |
|    | 1 |    |
| 1  |   |    |
|    | 3 | 4  |
|    |   |    |
|    | 1 | 3  |

|   |    |    |
|---|----|----|
|   |    | 2  |
| 4 |    |    |
| 3 |    | 4  |
|   | 1  | 2  |
|   |    | 1  |
| 1 |    |    |
| 1 |    | 1  |
| 6 | 8  | 7  |
| 2 | 7  | 7  |
|   | 1  | 2  |
|   | 11 | 31 |
|   | 3  | 4  |
|   |    | 3  |
|   |    | 2  |
|   | 1  |    |
|   | 2  | 4  |
|   | 3  |    |
| 1 | 3  | 7  |
| 5 | 6  | 12 |
| 3 |    |    |
|   | 2  |    |
|   | 2  | 1  |

1 2

3 4

5 2 3  
14  
1 3

2

1

1

2 4 7  
2

|    |    |    |
|----|----|----|
| 8  | 3  | 8  |
|    | 2  | 2  |
|    |    | 1  |
|    |    | 3  |
|    |    | 2  |
| 18 | 8  | 11 |
|    | 1  |    |
|    | 1  |    |
| 7  | 8  | 12 |
|    |    | 8  |
| 6  | 2  | 1  |
|    |    | 3  |
| 4  | 14 | 12 |
|    | 9  | 11 |
|    | 2  | 4  |
|    | 2  | 2  |
|    | 3  |    |
|    | 1  | 5  |
|    | 1  |    |
|    | 1  |    |
| 1  |    |    |

|   |   |   |
|---|---|---|
| 1 | 3 |   |
|   | 1 | 1 |
|   | 2 | 4 |
|   |   |   |
|   | 1 | 1 |
|   |   | 1 |
|   | 3 | 5 |
|   |   | 2 |
|   |   |   |
|   |   | 1 |
|   |   |   |
|   | 4 | 1 |
|   |   |   |
|   |   | 1 |
|   | 2 | 3 |
|   | 4 | 5 |
|   | 2 | 2 |
|   |   |   |
|   | 2 | 2 |
|   | 3 | 4 |
| 1 |   |   |
|   |   | 1 |
|   | 1 | 7 |
| 3 | 1 | 4 |
|   | 2 | 4 |
|   |   | 4 |
|   |   | 4 |
|   |   | 4 |



|   |   |   |
|---|---|---|
|   |   | 4 |
|   |   | 4 |
| 1 | 1 |   |
|   | 2 | 2 |
| 3 | 3 | 1 |
|   | 3 | 1 |
|   | 3 |   |
|   | 2 |   |
|   | 5 |   |
|   | 3 |   |
|   | 3 |   |
|   | 1 | 2 |
|   | 3 |   |
| 1 |   |   |
|   | 1 |   |
| 2 | 2 | 2 |
|   |   | 1 |
|   | 2 | 2 |
|   | 6 | 2 |

3

2

2

2

3

5

2

9

2

1

19

28

3

1

1

1

9

13

5

4

4

1

1

2

|   |    |    |
|---|----|----|
| 7 | 15 | 29 |
|   | 1  | 4  |
|   |    | 1  |
| 4 |    |    |

|   |   |   |
|---|---|---|
|   | 8 | 1 |
| 8 | 3 | 4 |
|   | 3 |   |
|   |   | 1 |

|   |   |  |
|---|---|--|
| 1 | 1 |  |
|   | 3 |  |
|   | 5 |  |

|   |    |    |
|---|----|----|
|   | 10 | 19 |
| 3 | 6  | 7  |
| 2 | 4  | 5  |
|   |    | 2  |
|   | 2  |    |
|   |    | 4  |

2 1  
7 4  
6

1

2 3 2  
3

2 3 4  
1 6 7

4

1 2  
3

2

1 2

|   |    |   |
|---|----|---|
|   | 1  | 2 |
|   |    |   |
| 4 | 3  | 1 |
|   | 2  | 3 |
|   | 1  | 6 |
|   |    | 1 |
|   | 1  | 4 |
|   |    | 3 |
| 1 |    |   |
| 1 |    |   |
|   | 1  | 3 |
| 6 | 4  | 9 |
| 4 | 11 | 6 |
| 2 | 4  | 6 |
|   | 1  |   |
|   | 6  | 6 |
| 5 | 2  | 5 |
|   |    | 3 |

2 1  
2

2 3  
4

2 1  
3  
1 2

1 4  
2

1  
2

2

1

14 2  
22

2 2

---
