# Supplementary material
Source: PubMed Central journal article supplement (PMC4641440)
Supplement: NIHMS732399-supplement-Supplementary_Table_3.pdf [file NIHMS732399-supplement-Supplementary_Table_3.pdf]

## Supplemental Table 3

| PDGFR $\alpha$ Immunostaining of Tissue Blocks |           |     |        |                     |                    |                 |
|------------------------------------------------|-----------|-----|--------|---------------------|--------------------|-----------------|
| PT #                                           | DIAGNOSIS | AGE | GENDER | LOCATION            | BLOCK              | PDGFR- $\alpha$ |
| 1                                              | ER        | 13  | F      | Left eye            | S1B1, S1B2         | NEG             |
| 2                                              | ER        | 6   | M      | Nasal               | S1B1<br>S2B1       | NEG<br>NEG      |
| 3                                              | ER        | 2   | M      | Lung met            | S1B1, S1B2         | NEG             |
| 4                                              | AR        | 37  | F      | Kidney met          | S1B1, S1B2         | NEG             |
| 5                                              | AR        | 38  | M      | Nasal               | S1B1               | 3+              |
| 6                                              | ER        | 64  | F      | Nasal               | S1B1               | NEG             |
| 7                                              | R         | 39  | M      | Pleura + chest wall | S1B1, S1B2         | NEG             |
| 8                                              | R         | 56  | M      | Brain met           | S1B1, S1B2         | 2+              |
|                                                |           |     |        | Lung met            | S2B1               | NEG             |
|                                                |           |     |        | Subcutaneous met    | S3B1, S3B2         | NEG             |
|                                                |           |     |        | Lung met            | S4B1               | NEG             |
| 9                                              | ER        | 18  | M      | Shoulder            | S1B1, S1B2         | 1+              |
| 10                                             | ER        | 74  | M      | Groin               | S1B1, S1B2         | NEG             |
| 11                                             | ER        | 61  | M      | Leg                 | S1B1, S1B2         | NEG             |
| 12                                             | AR        | 44  | F      | Paraspinal met      | S1B1               | NEG             |
| 13                                             | ER        | 35  | F      | Nasal               | S1B1, S1B2<br>S2B1 | NEG<br>NEG      |
| 14                                             | AR        | 29  | M      | Spinal met          | S1B1<br>S2B1       | NEG<br>NEG      |
| 15                                             | R         | 32  | M      | Eye                 | S1B1               | 1+              |
| 16                                             | ER        | 19  | M      | Nasal               | S1B1               | 2+              |

### LEGEND:

ER= Embryonal rhabdomyosarcoma

AR= Alveolar rhabdomyosarcoma

R=Rhabdomyosarcoma, NOS

S=Specimen

B=Block

PT=Patient
