# Supplementary material
Source: PubMed Central journal article supplement (PMC4641440)
Supplement: NIHMS732399-supplement-Supplementary_Table_4.pdf [file NIHMS732399-supplement-Supplementary_Table_4.pdf]

## Supplemental Table 4

|                      | Tumor 1     | Tumor 2 | Tumor 3 |
|----------------------|-------------|---------|---------|
| Histology            | Liposarcoma | MPNST   | SRBCT   |
| Tumor Wet Weight (g) | 0.983       | 1.22    | 1.29    |
| Protein amount (g )  | 0.032       | 0.064   | 0.08    |
