# Supplementary material
Source: PubMed Central journal article supplement (PMC4641440)

# Supplemental Figure 2

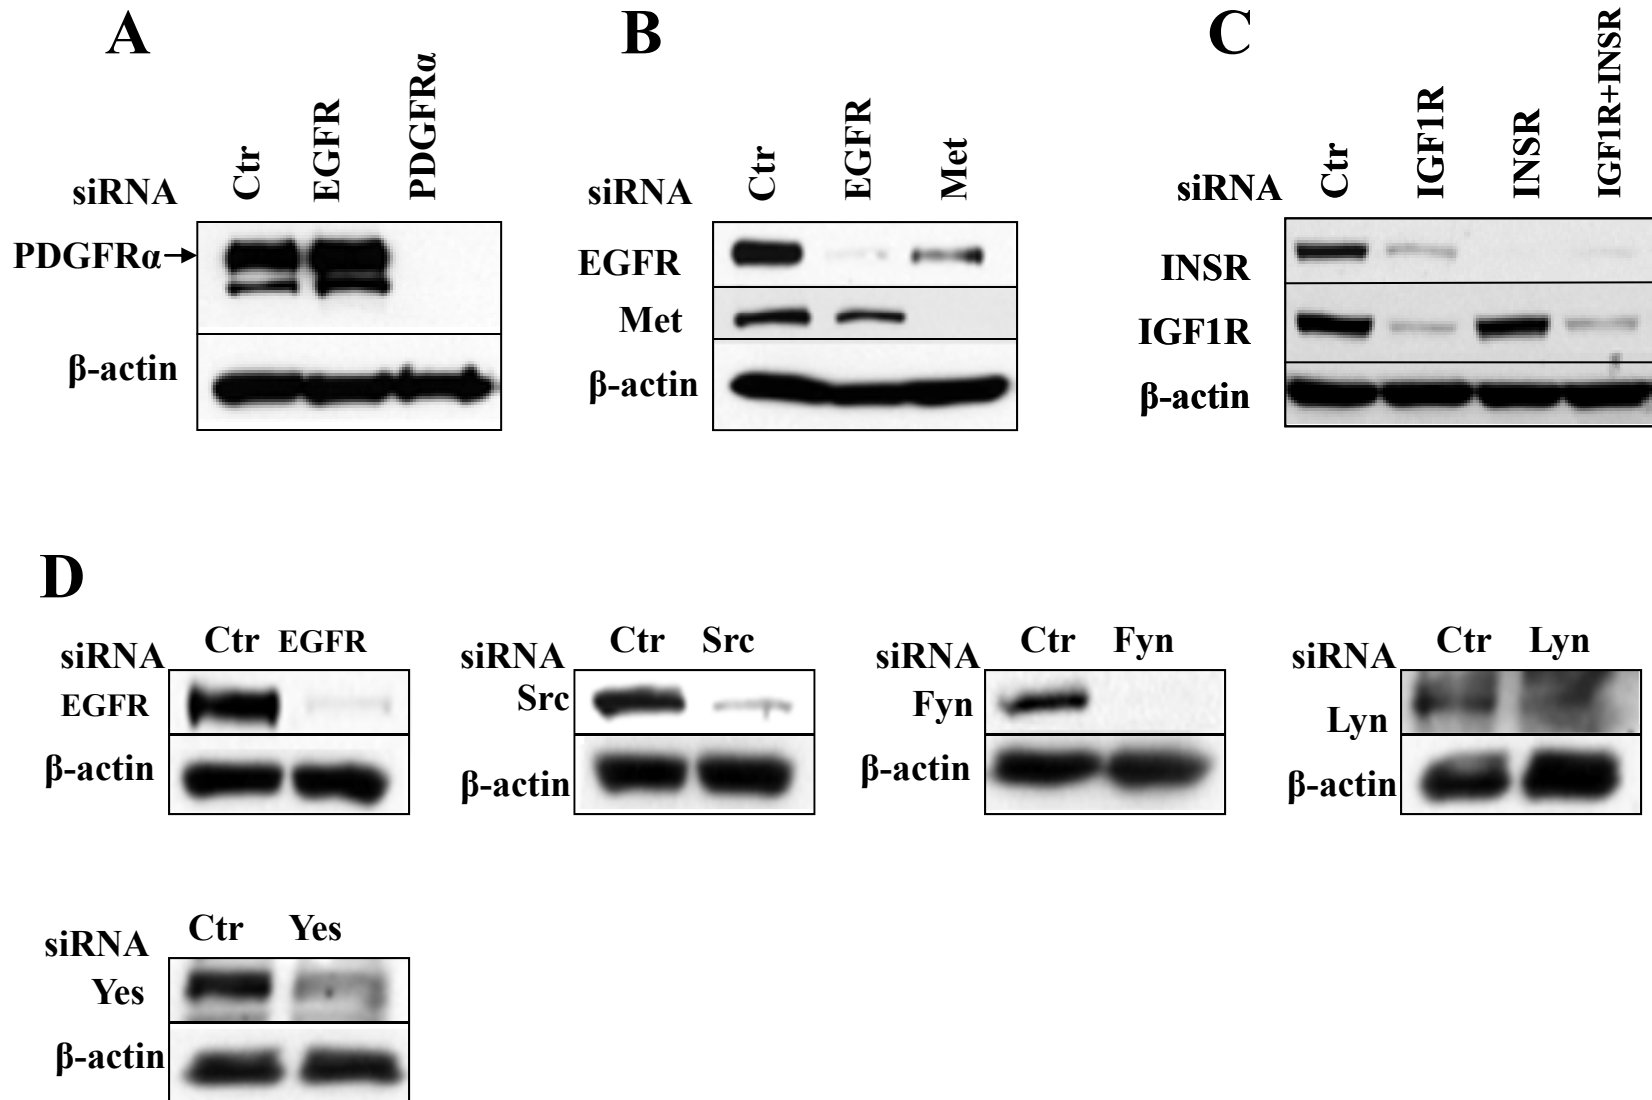

Supplement: NIHMS732399-supplement-Supplementary_Figure_2.pdf [file NIHMS732399-supplement-Supplementary_Figure_2.pdf]

# Supplemental Figure 3

A

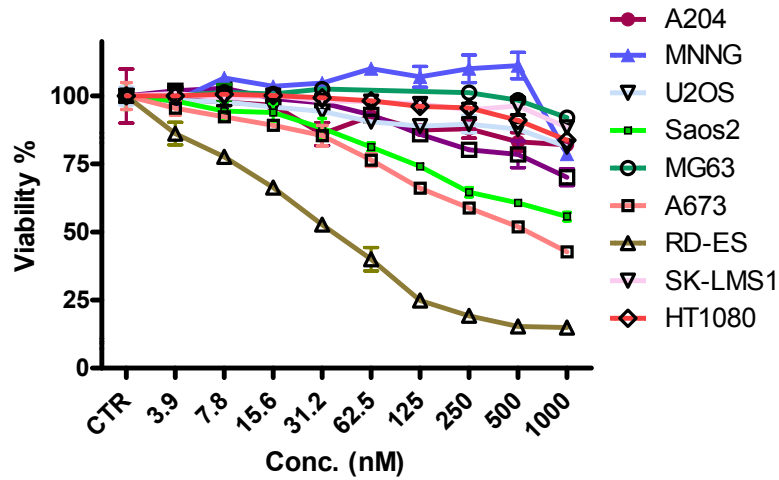

B

| Cell line | IC50 $\mu$ M |
|-----------|--------------|
| A204      | >1           |
| RD18      | >1           |
| MNNG      | >1           |
| U2OS      | >1           |
| Saos2     | 0.69         |
| MG63      | >1           |
| A673      | 0.41         |
| RD-ES     | 0.04         |
| SK-LMS1   | >1           |
| HT1080    | >1           |

C

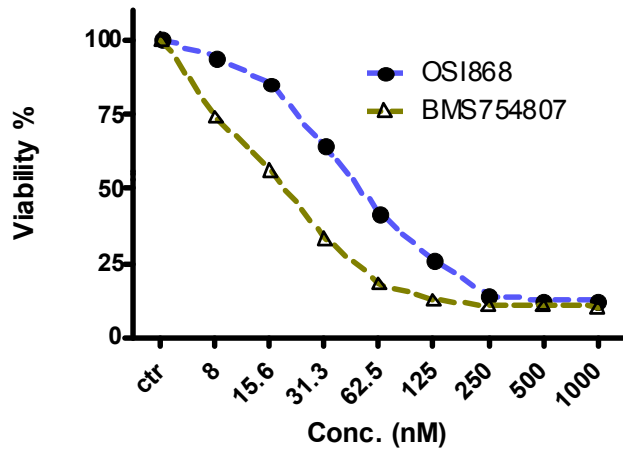

Supplement: NIHMS732399-supplement-Supplementary_Figure_3.pdf [file NIHMS732399-supplement-Supplementary_Figure_3.pdf]
